# Supplementary material for: Design and synthesis of piperine-based photoaffinity probes for revealing potential targets of piperine in neurological disease
Source: Royal Society of Chemistry journal article supplement (doi:10.1039/d4cc04330h), 2024-11-29
Supplement: d4cc04330h2.xlsx [file d4cc04330h2.xlsx]

## Sheet: Table S1
Full lists of protein targets of the control group (n=3)
ProteinAccessions	Genes	ProteinDescriptions	Mass（KD）	PSMS			UniquePeptides
				control 1_1	control 1_2	control 1_3	control1_1	control 1_2	control 1_3
P63313	TMSB10	Thymosin beta-10	5.026	5	3	8	2	2	3
P62328	TMSB4X	Thymosin beta-4	5.053	12	10	16	3	4	5
P02795	MT2A	Metallothionein-2	6.042	3	2	1	2	2	1
P62857	RPS28	Small ribosomal subunit protein eS28	7.841	1	2	2	2	1	2
P06703	S100A6	Protein S100-A6	10.18	2	2	2	2	2	2
P59665	DEFA1	Neutrophil defensin 1	10.201	1	2	1	1	1	1
P61604	HSPE1	10 kDa heat shock protein, mitochondrial	10.932	4	2	6	2	3	3
P01040	CSTA	Cystatin-A	11.006	3	4	4	3	3	3
P02652	APOA2	Apolipoprotein A-II	11.175	4	3	4	2	4	4
P81605	DCD	Dermcidin	11.284	3	5	2	2	2	1
P0DOY2	IGLC2	Immunoglobulin lambda constant 2	11.294	5	5	8	2	2	3
P62805	H4C1	Histone H4	11.367	20	13	11	6	6	5
P20962	PTMS	Parathymosin	11.53	3	2	2	1	1	1
P26447	S100A4	Protein S100-A4	11.729	2	3	2	2	2	1
P10599	TXN	Thioredoxin	11.737	3	4	2	3	2	2
P31949	S100A11	Protein S100-A11	11.74	1	1	5	1	1	3
P01834	IGKC	Immunoglobulin kappa constant	11.765	2	1	1	1	1	1
P06454	PTMA	Prothymosin alpha	12.203	9	7	7	4	4	4
P01742	IGHV1-69	Immunoglobulin heavy variable 1-69	12.659	2	2	1	1	2	1
P63027	VAMP2	Vesicle-associated membrane protein 2	12.663	1	1	1	1	1	1
P62888	RPL30	Large ribosomal subunit protein eL30	12.784	1	1	1	1	1	1
A0A075B6P5	IGKV2-28	Immunoglobulin kappa variable 2-28	12.957	3	1	1	1	1	1
P62851	RPS25	Small ribosomal subunit protein eS25	13.742	3	2	1	2	2	1
O60814	H2BC12	Histone H2B type 1-K	13.89	2	10	8	3	1	4
P04908	H2AC4	Histone H2A type 1-B/E	14.135	12	17	8	4	3	3
P25398	RPS12	Small ribosomal subunit protein eS12	14.515	2	1	2	1	1	2
P09382	LGALS1	Galectin-1	14.716	4	3	2	3	3	2
P35268	RPL22	Large ribosomal subunit protein eL22	14.787	1	2	2	1	1	2
P05413	FABP3	Fatty acid-binding protein, heart	14.858	2	3	1	2	1	1
Q15121	PEA15	Astrocytic phosphoprotein PEA-15	15.04	1	1	1	1	1	1
P07737	PFN1	Profilin-1	15.054	2	1	2	1	2	2
P69905	HBA1	Hemoglobin subunit alpha	15.258	24	25	20	6	5	5
O60361	NME2P1	Putative nucleoside diphosphate kinase	15.529	1	1	1	1	1	1
P62266	RPS23	Small ribosomal subunit protein uS12	15.808	1	1	1	1	1	1
Q9NZT1	CALML5	Calmodulin-like protein 5	15.893	3	4	2	2	2	1
P68871	HBB	Hemoglobin subunit beta	15.998	20	16	13	7	7	7
P39019	RPS19	Small ribosomal subunit protein eS19	16.06	2	2	3	2	2	2
P62263	RPS14	Small ribosomal subunit protein uS11	16.273	1	2	2	1	1	2
P62249	RPS16	Small ribosomal subunit protein uS9	16.445	1	1	1	1	1	1
P0DP23	CALM1	Calmodulin-1	16.838	7	7	14	4	4	6
P60660	MYL6	Myosin light polypeptide 6	16.93	9	8	7	5	6	6
P62277	RPS13	Small ribosomal subunit protein uS15	17.222	2	1	2	1	2	2
P61254	RPL26	Large ribosomal subunit protein uL24	17.258	2	1	1	1	2	1
P16949	STMN1	Stathmin	17.303	3	4	3	3	3	3
P62269	RPS18	Small ribosomal subunit protein uS13	17.719	2	1	1	1	2	1
P30050	RPL12	Large ribosomal subunit protein uL11	17.819	2	1	3	1	2	2
P62937	PPIA	Peptidyl-prolyl cis-trans isomerase A	18.012	4	3	3	3	2	2
P23528	CFL1	Cofilin-1	18.502	6	9	12	7	3	7
P60981	DSTN	Destrin	18.506	2	2	1	2	2	1
Q96A32	MYL11	Myosin regulatory light chain 11	19.015	5	2	5	1	2	2
P62633	CNBP	CCHC-type zinc finger nucleic acid binding protein	19.463	1	5	3	3	1	2
P49006	MARCKSL1	MARCKS-related protein	19.529	1	1	3	1	1	2
P24844	MYL9	Myosin regulatory light polypeptide 9	19.827	2	2	2	2	2	2
O00193	SMAP	Small acidic protein	20.333	11	8	14	3	3	3
P18085	ARF4	ADP-ribosylation factor 4	20.511	2	1	2	1	1	1
P21291	CSRP1	Cysteine and glycine-rich protein 1	20.567	2	3	5	2	2	1
Q9Y2B0	CNPY2	Protein canopy homolog 2	20.652	1	2	2	1	1	1
P30086	PEBP1	Phosphatidylethanolamine-binding protein 1	21.057	1	2	1	1	1	1
P05976	MYL1	Myosin light chain 1/3, skeletal muscle isoform	21.145	3	2	7	2	3	3
P16403	H1-2	Histone H1.2	21.365	8	4	9	4	6	6
P18621	RPL17	Large ribosomal subunit protein uL22	21.397	3	2	1	2	2	1
P84157	MXRA7	Matrix-remodeling-associated protein 7	21.466	10	9	5	2	2	2
Q07020	RPL18	Large ribosomal subunit protein eL18	21.634	5	4	1	3	4	1
P10412	H1-4	Histone H1.4	21.865	1	1	1	1	1	1
O43583	DENR	Density-regulated protein	22.092	1	1	1	1	1	1
Q06830	PRDX1	Peroxiredoxin-1	22.11	8	8	8	7	6	7
Q9H3Z4	DNAJC5	DnaJ homolog subfamily C member 5	22.149	5	7	8	3	3	3
O43399	TPD52L2	Tumor protein D54	22.238	2	1	10	1	2	6
Q14919	DRAP1	Dr1-associated corepressor	22.35	5	3	6	2	3	4
P37802	TAGLN2	Transgelin-2	22.391	8	14	16	7	5	9
Q9UI15	TAGLN3	Transgelin-3	22.473	1	2	2	1	1	1
P16401	H1-5	Histone H1.5	22.58	1	1	3	1	1	1
P46781	RPS9	Small ribosomal subunit protein uS4	22.591	7	9	3	7	6	3
Q01995	TAGLN	Transgelin	22.611	16	15	16	9	8	8
Q9Y3E1	HDGFL3	Hepatoma-derived growth factor-related protein 3	22.62	2	1	2	1	2	1
P80723	BASP1	Brain acid soluble protein 1	22.693	3	1	3	1	3	2
P04792	HSPB1	Heat shock protein beta-1	22.783	2	3	5	3	2	5
P0DOX8	NaN	Immunoglobulin lambda-1 light chain	22.83	6	8	2	4	5	2
P41236	PPP1R2	Protein phosphatase inhibitor 2	23.015	5	5	4	2	2	2
O76080	ZFAND5	AN1-type zinc finger protein 5	23.132	1	4	2	4	1	2
P43487	RANBP1	Ran-specific GTPase-activating protein	23.31	4	5	8	5	4	4
P0DOX7	NaN	Immunoglobulin kappa light chain	23.379	9	7	9	4	5	6
P50914	RPL14	Large ribosomal subunit protein eL14	23.432	1	1	1	1	1	1
P84098	RPL19	Large ribosomal subunit protein eL19	23.466	1	1	1	1	1	1
P02763	ORM1	Alpha-1-acid glycoprotein 1	23.54	3	2	2	1	2	2
P82979	SARNP	SAP domain-containing ribonucleoprotein	23.671	16	17	24	8	7	7
Q8N128	FAM177A1	Protein FAM177A1	23.757	3	4	2	4	3	2
Q9UQN3	CHMP2B	Charged multivesicular body protein 2b	23.907	7	5	7	5	5	5
P26583	HMGB2	High mobility group protein B2	24.034	1	1	1	1	1	1
B2RPK0	HMGB1P1	Putative high mobility group protein B1-like 1	24.238	6	6	5	5	4	4
P26373	RPL13	Large ribosomal subunit protein eL13	24.261	17	9	6	7	10	5
P55327	TPD52	Tumor protein D52	24.327	1	1	2	1	1	2
Q9HD15	SRA1	Steroid receptor RNA activator 1	24.4	9	11	6	5	5	3
Q9NZZ3	CHMP5	Charged multivesicular body protein 5	24.571	8	4	16	2	5	5
P24534	EEF1B2	Elongation factor 1-beta	24.764	21	16	15	9	8	6
Q8N488	RYBP	RING1 and YY1-binding protein	24.822	7	27	13	8	5	7
Q9H444	CHMP4B	Charged multivesicular body protein 4b	24.95	4	8	10	5	4	6
P30041	PRDX6	Peroxiredoxin-6	25.035	1	2	1	2	1	1
Q9Y3E7	CHMP3	Charged multivesicular body protein 3	25.073	1	1	2	1	1	2
Q00688	FKBP3	Peptidyl-prolyl cis-trans isomerase FKBP3	25.177	2	2	4	2	2	3
P09497	CLTB	Clathrin light chain B	25.19	6	6	9	5	5	6
Q96MW1	CCDC43	Coiled-coil domain-containing protein 43	25.248	2	1	2	1	2	2
Q01130	SRSF2	Serine/arginine-rich splicing factor 2	25.476	15	19	13	6	5	5
P0CG47	UBB	Polyubiquitin-B	25.762	15	17	21	5	5	5
Q9Y680	FKBP7	Peptidyl-prolyl cis-trans isomerase FKBP7	25.794	1	1	1	1	1	1
Q96CT7	CCDC124	Coiled-coil domain-containing protein 124	25.835	12	14	9	3	3	2
Q9BVC5	C2orf49	Ashwin	25.858	2	2	2	1	2	2
O75391	SPAG7	Sperm-associated antigen 7	26.034	9	2	6	2	5	4
P36543	ATP6V1E1	V-type proton ATPase subunit E 1	26.145	12	12	11	6	6	5
Q9HB71	CACYBP	Calcyclin-binding protein	26.21	3	1	3	1	2	3
P54105	CLNS1A	Methylosome subunit pICln	26.215	1	5	5	2	1	2
O95999	BCL10	B-cell lymphoma/leukemia 10	26.252	6	1	7	1	5	5
Q9Y3Y2	CHTOP	Chromatin target of PRMT1 protein	26.397	4	3	5	2	2	2
Q96CF2	CHMP4C	Charged multivesicular body protein 4c	26.411	1	2	1	2	1	1
P54819	AK2	Adenylate kinase 2, mitochondrial	26.478	2	1	3	1	2	3
P07477	PRSS1	Serine protease 1	26.558	6	4	5	2	2	2
Q9P013	CWC15	Spliceosome-associated protein CWC15 homolog	26.624	9	11	9	7	7	7
P60174	TPI1	Triosephosphate isomerase	26.669	4	3	6	3	3	4
P23396	RPS3	Small ribosomal subunit protein uS3	26.688	15	20	13	12	9	7
Q96C19	EFHD2	EF-hand domain-containing protein D2	26.697	17	32	40	11	8	11
O75940	SMNDC1	Survival of motor neuron-related-splicing factor 30	26.711	13	12	8	7	7	7
P51858	HDGF	Hepatoma-derived growth factor	26.788	3	4	3	2	2	2
Q86V81	ALYREF	THO complex subunit 4	26.888	38	45	43	10	10	9
O00299	CLIC1	Chloride intracellular channel protein 1	26.923	7	2	7	2	5	7
P09496	CLTA	Clathrin light chain A	27.077	24	19	23	6	6	7
Q9UKY7	CDV3	Protein CDV3 homolog	27.335	6	4	4	3	4	3
Q16629	SRSF7	Serine/arginine-rich splicing factor 7	27.367	1	4	4	3	1	4
Q15056	EIF4H	Eukaryotic translation initiation factor 4H	27.385	37	36	35	13	15	14
Q9UL46	PSME2	Proteasome activator complex subunit 2	27.402	1	2	1	2	1	1
Q9H2J4	PDCL3	Phosducin-like protein 3	27.614	6	13	8	3	3	4
Q9NX40	OCIAD1	OCIA domain-containing protein 1	27.626	2	4	6	3	2	4
P31944	CASP14	Caspase-14	27.68	3	5	3	4	2	3
P63104	YWHAZ	14-3-3 protein zeta/delta	27.745	12	10	18	7	7	11
Q07955	SRSF1	Serine/arginine-rich splicing factor 1	27.745	15	21	20	11	8	10
P27348	YWHAQ	14-3-3 protein theta	27.764	6	14	7	9	6	6
P62917	RPL8	Large ribosomal subunit protein uL2	28.025	7	9	7	7	7	4
P31946	YWHAB	14-3-3 protein beta/alpha	28.082	23	3	7	2	10	5
P61981	YWHAG	14-3-3 protein gamma	28.303	4	3	3	2	4	3
P13984	GTF2F2	General transcription factor IIF subunit 2	28.38	7	5	4	5	6	4
P09661	SNRPA1	U2 small nuclear ribonucleoprotein A'	28.416	1	1	1	1	1	1
P67936	TPM4	Tropomyosin alpha-4 chain	28.522	54	90	67	23	23	21
P62753	RPS6	Small ribosomal subunit protein eS6	28.681	2	5	6	3	2	4
Q06323	PSME1	Proteasome activator complex subunit 1	28.723	10	6	13	4	7	7
P12004	PCNA	Proliferating cell nuclear antigen	28.769	19	28	24	9	10	10
Q92688	ANP32B	Acidic leucine-rich nuclear phosphoprotein 32 family member B	28.788	3	6	5	2	2	2
O95721	SNAP29	Synaptosomal-associated protein 29	28.97	8	13	14	5	4	3
Q16594	TAF9	Transcription initiation factor TFIID subunit 9	28.974	8	3	9	3	4	6
P30040	ERP29	Endoplasmic reticulum resident protein 29	28.993	1	2	3	2	1	3
P50402	EMD	Emerin	28.994	2	3	3	2	2	3
O75822	EIF3J	Eukaryotic translation initiation factor 3 subunit J	29.062	6	12	16	6	6	7
Q96G25	MED8	Mediator of RNA polymerase II transcription subunit 8	29.08	5	3	3	2	3	2
P62258	YWHAE	14-3-3 protein epsilon	29.174	20	23	17	13	12	10
O43752	STX6	Syntaxin-6	29.176	2	4	4	3	1	3
P18124	RPL7	Large ribosomal subunit protein uL30	29.226	1	1	2	1	1	1
P61289	PSME3	Proteasome activator complex subunit 3	29.506	1	1	1	1	1	1
P25786	PSMA1	Proteasome subunit alpha type-1	29.556	7	14	12	8	6	7
P07451	CA3	Carbonic anhydrase 3	29.557	2	1	1	1	1	1
P62701	RPS4X	Small ribosomal subunit protein eS4, X isoform	29.598	7	9	3	7	7	3
Q9Y5M8	SRPRB	Signal recognition particle receptor subunit beta	29.702	1	1	2	1	1	1
Q14847	LASP1	LIM and SH3 domain protein 1	29.717	14	20	21	12	9	12
O75937	DNAJC8	DnaJ homolog subfamily C member 8	29.842	4	16	20	9	3	9
Q8WXX5	DNAJC9	DnaJ homolog subfamily C member 9	29.91	2	6	5	3	2	4
P61247	RPS3A	Small ribosomal subunit protein eS1	29.945	8	9	9	8	7	8
P62424	RPL7A	Large ribosomal subunit protein eL8	29.996	1	7	2	3	1	2
Q15691	MAPRE1	Microtubule-associated protein RP/EB family member 1	29.999	5	11	2	6	4	2
Q9UBV8	PEF1	Peflin	30.381	1	1	2	1	1	2
Q13162	PRDX4	Peroxiredoxin-4	30.54	1	1	2	1	1	1
P47756	CAPZB	F-actin-capping protein subunit beta	30.629	5	4	3	4	3	2
Q9BTT0	ANP32E	Acidic leucine-rich nuclear phosphoprotein 32 family member E	30.692	2	2	13	2	2	5
Q9BT09	CNPY3	Protein canopy homolog 3	30.748	3	5	4	3	3	3
P21796	VDAC1	Voltage-dependent anion-selective channel protein 1	30.773	7	18	12	8	5	7
P02647	APOA1	Apolipoprotein A-I	30.778	17	16	22	12	10	12
Q13151	HNRNPA0	Heterogeneous nuclear ribonucleoprotein A0	30.841	1	1	2	1	1	1
O94760	DDAH1	N(G),N(G)-dimethylarginine dimethylaminohydrolase 1	31.122	3	7	8	5	2	5
P29692	EEF1D	Elongation factor 1-delta	31.122	23	19	16	8	9	4
Q13643	FHL3	Four and a half LIM domains protein 3	31.192	1	3	2	3	1	2
P09012	SNRPA	U1 small nuclear ribonucleoprotein A	31.28	6	8	4	5	6	4
P15880	RPS2	Small ribosomal subunit protein uS5	31.324	11	11	6	7	6	4
P45880	VDAC2	Voltage-dependent anion-selective channel protein 2	31.567	3	7	3	5	3	3
O00625	PIR	Pirin	32.113	2	5	4	4	1	4
Q14192	FHL2	Four and a half LIM domains protein 2	32.193	2	3	5	3	2	4
Q14165	MLEC	Malectin	32.234	2	7	1	4	2	1
P43307	SSR1	Translocon-associated protein subunit alpha	32.235	2	8	10	3	2	3
P35030	PRSS3	Trypsin-3	32.529	3	2	5	1	1	1
P06748	NPM1	Nucleophosmin	32.575	2	6	5	3	1	4
P09493	TPM1	Tropomyosin alpha-1 chain	32.709	19	21	25	12	10	16
O95983	MBD3	Methyl-CpG-binding domain protein 3	32.844	4	4	4	3	2	2
P07951	TPM2	Tropomyosin beta chain	32.851	7	9	8	7	6	6
P05141	SLC25A5	ADP/ATP translocase 2	32.852	2	7	2	4	2	2
P06753	TPM3	Tropomyosin alpha-3 chain	32.95	33	60	56	9	8	9
P36542	ATP5F1C	ATP synthase subunit gamma, mitochondrial	32.996	5	2	1	1	3	1
P51911	CNN1	Calponin-1	33.17	2	3	3	2	2	3
Q9Y314	NOSIP	Nitric oxide synthase-interacting protein	33.172	2	1	2	1	1	1
P54920	NAPA	Alpha-soluble NSF attachment protein	33.233	4	6	3	4	4	3
Q04323	UBXN1	UBX domain-containing protein 1	33.325	3	3	3	2	2	3
P07910	HNRNPC	Heterogeneous nuclear ribonucleoproteins C1/C2	33.67	4	4	3	1	2	2
Q99439	CNN2	Calponin-2	33.697	4	17	9	6	3	6
Q8NBJ7	SUMF2	Inactive C-alpha-formylglycine-generating enzyme 2	33.843	5	6	9	5	3	5
Q9UBR2	CTSZ	Cathepsin Z	33.868	1	1	2	1	1	1
O43765	SGTA	Small glutamine-rich tetratricopeptide repeat-containing protein alpha	34.063	2	5	8	3	1	4
P25311	AZGP1	Zinc-alpha-2-glycoprotein	34.259	1	3	1	2	1	1
P05388	RPLP0	Large ribosomal subunit protein uL10	34.274	5	7	9	5	4	5
O15144	ARPC2	Actin-related protein 2/3 complex subunit 2	34.333	1	7	2	6	1	1
P46777	RPL5	Large ribosomal subunit protein uL18	34.363	2	7	6	5	2	4
Q15006	EMC2	ER membrane protein complex subunit 2	34.834	1	5	1	3	1	1
Q96AG4	LRRC59	Leucine-rich repeat-containing protein 59	34.93	1	1	1	1	1	1
P63244	RACK1	Small ribosomal subunit protein RACK1	35.077	9	15	9	11	7	7
P13804	ETFA	Electron transfer flavoprotein subunit alpha, mitochondrial	35.08	6	14	2	5	5	1
Q9Y448	KNSTRN	Small kinetochore-associated protein	35.438	1	2	1	2	1	1
P40926	MDH2	Malate dehydrogenase, mitochondrial	35.503	6	22	18	12	4	11
O75821	EIF3G	Eukaryotic translation initiation factor 3 subunit G	35.611	1	4	2	3	1	2
P09525	ANXA4	Annexin A4	35.883	7	10	8	5	5	4
P67809	YBX1	Y-box-binding protein 1	35.924	1	1	1	1	1	1
P08758	ANXA5	Annexin A5	35.937	8	10	7	7	5	4
P04406	GAPDH	Glyceraldehyde-3-phosphate dehydrogenase	36.053	6	10	10	6	4	6
Q16698	DECR1	2,4-dienoyl-CoA reductase [(3E)-enoyl-CoA-producing], mitochondrial	36.068	2	1	1	1	1	1
O00151	PDLIM1	PDZ and LIM domain protein 1	36.072	3	3	8	2	2	5
P02649	APOE	Apolipoprotein E	36.154	5	2	2	1	3	2
Q99729	HNRNPAB	Heterogeneous nuclear ribonucleoprotein A/B	36.225	4	5	10	3	3	5
P07195	LDHB	L-lactate dehydrogenase B chain	36.638	1	1	1	1	1	1
P00338	LDHA	L-lactate dehydrogenase A chain	36.689	5	9	8	5	5	5
P31942	HNRNPH3	Heterogeneous nuclear ribonucleoprotein H3	36.926	3	3	3	1	2	3
O43852	CALU	Calumenin	37.107	12	12	17	5	5	6
P22626	HNRNPA2B1	Heterogeneous nuclear ribonucleoproteins A2/B1	37.43	68	58	109	18	17	17
Q96D15	RCN3	Reticulocalbin-3	37.493	1	8	4	2	1	2
Q15365	PCBP1	Poly(rC)-binding protein 1	37.498	2	6	3	4	2	2
P02749	APOH	Beta-2-glycoprotein 1	38.298	2	1	3	1	2	2
P51884	LUM	Lumican	38.429	2	1	1	1	2	1
Q14103	HNRNPD	Heterogeneous nuclear ribonucleoprotein D0	38.434	10	9	9	6	7	6
P07355	ANXA2	Annexin A2	38.604	6	14	15	9	6	10
P04083	ANXA1	Annexin A1	38.714	2	8	7	6	2	6
P09651	HNRNPA1	Heterogeneous nuclear ribonucleoprotein A1	38.747	30	33	49	11	13	12
Q15293	RCN1	Reticulocalbin-1	38.89	2	1	2	1	2	2
P02765	AHSG	Alpha-2-HS-glycoprotein	39.341	5	2	2	1	4	1
P04075	ALDOA	Fructose-bisphosphate aldolase A	39.42	6	5	9	5	5	5
P05062	ALDOB	Fructose-bisphosphate aldolase B	39.473	3	2	2	1	1	1
P51991	HNRNPA3	Heterogeneous nuclear ribonucleoprotein A3	39.595	27	28	43	9	10	9
P16989	YBX3	Y-box-binding protein 3	40.09	9	3	5	3	4	3
Q00325	SLC25A3	Solute carrier family 25 member 3	40.095	2	2	3	2	1	2
Q9UNZ2	NSFL1C	NSFL1 cofactor p47	40.573	6	14	8	9	5	7
P55036	PSMD4	26S proteasome non-ATPase regulatory subunit 4	40.737	1	4	3	2	1	3
P50502	ST13	Hsc70-interacting protein	41.332	2	1	2	1	1	1
P38159	RBMX	RNA-binding motif protein, X chromosome	42.332	9	8	6	5	7	5
P01876	IGHA1	Immunoglobulin heavy constant alpha 1	42.849	5	5	7	4	4	4
P06732	CKM	Creatine kinase M-type	43.101	3	1	5	1	3	4
P54727	RAD23B	UV excision repair protein RAD23 homolog B	43.171	3	3	4	3	2	3
Q6NZI2	CAVIN1	Caveolae-associated protein 1	43.476	6	8	23	6	4	9
P01859	IGHG2	Immunoglobulin heavy constant gamma 2	43.806	3	7	4	2	1	1
P01857	IGHG1	Immunoglobulin heavy constant gamma 1	43.912	8	7	8	3	3	3
P29558	RBMS1	RNA-binding motif, single-stranded-interacting protein 1	44.505	2	5	2	4	2	2
P07339	CTSD	Cathepsin D	44.552	2	3	2	2	2	1
Q8NC51	SERBP1	SERPINE1 mRNA-binding protein 1	44.965	15	18	13	11	11	10
Q93088	BHMT	Betaine--homocysteine S-methyltransferase 1	44.998	4	2	1	2	2	1
P00738	HP	Haptoglobin	45.205	13	13	14	9	9	10
Q9BY77	POLDIP3	Polymerase delta-interacting protein 3	46.089	3	6	4	4	2	4
Q96P63	SERPINB12	Serpin B12	46.276	1	5	3	5	1	3
O14979	HNRNPDL	Heterogeneous nuclear ribonucleoprotein D-like	46.438	2	2	4	2	1	3
P50454	SERPINH1	Serpin H1	46.441	2	1	1	1	2	1
Q9Y383	LUC7L2	Putative RNA-binding protein Luc7-like 2	46.514	2	4	1	4	2	1
P01009	SERPINA1	Alpha-1-antitrypsin	46.737	12	9	9	8	8	7
P13929	ENO3	Beta-enolase	46.987	2	2	2	1	2	2
P06733	ENO1	Alpha-enolase	47.169	7	7	5	5	5	4
P01011	SERPINA3	Alpha-1-antichymotrypsin	47.651	2	1	4	1	2	2
Q15084	PDIA6	Protein disulfide-isomerase A6	48.121	2	1	5	1	2	3
P27797	CALR	Calreticulin	48.142	3	2	2	2	1	2
Q9UJU6	DBNL	Drebrin-like protein	48.207	7	12	9	7	5	6
P01860	IGHG3	Immunoglobulin heavy constant gamma 3	49.093	9	8	8	5	4	5
P31943	HNRNPH1	Heterogeneous nuclear ribonucleoprotein H	49.229	6	2	2	2	5	1
P26641	EEF1G	Elongation factor 1-gamma	50.119	35	16	10	10	17	8
P68104	EEF1A1	Elongation factor 1-alpha 1	50.141	18	17	10	10	9	7
Q9UKX7	NUP50	Nuclear pore complex protein Nup50	50.144	1	1	1	1	1	1
P68363	TUBA1B	Tubulin alpha-1B chain	50.152	8	7	6	6	6	3
Q16181	SEPTIN7	Septin-7	50.68	1	5	3	4	1	3
O43670	ZNF207	BUB3-interacting and GLEBS motif-containing protein ZNF207	50.751	1	3	2	2	1	1
P61978	HNRNPK	Heterogeneous nuclear ribonucleoprotein K	50.976	14	25	25	12	9	11
P08779	KRT16	Keratin, type I cytoskeletal 16	51.268	7	19	8	11	5	6
Q92743	HTRA1	Serine protease HTRA1	51.287	2	3	4	3	2	4
P02679	FGG	Fibrinogen gamma chain	51.512	3	2	1	1	3	1
Q15517	CDSN	Corneodesmosin	51.522	1	3	2	2	1	2
P02533	KRT14	Keratin, type I cytoskeletal 14	51.561	28	59	49	26	18	22
P02790	HPX	Hemopexin	51.676	3	2	1	1	2	1
P01871	IGHM	Immunoglobulin heavy constant mu	51.924	3	2	5	2	3	3
Q13283	G3BP1	Ras GTPase-activating protein-binding protein 1	52.164	1	4	5	2	1	3
P10909	CLU	Clusterin	52.495	2	1	3	1	2	3
P01008	SERPINC1	Antithrombin-III	52.602	3	3	5	3	2	5
P02774	GC	Vitamin D-binding protein	52.918	4	1	2	1	3	2
P35637	FUS	RNA-binding protein FUS	53.426	14	25	15	4	5	4
P17661	DES	Desmin	53.536	22	24	15	17	16	9
P08670	VIM	Vimentin	53.652	14	17	32	11	12	20
Q15233	NONO	Non-POU domain-containing octamer-binding protein	54.232	1	1	4	1	1	2
P04004	VTN	Vitronectin	54.306	3	1	2	1	3	2
P02675	FGB	Fibrinogen beta chain	55.928	2	2	5	2	2	4
P06576	ATP5F1B	ATP synthase subunit beta, mitochondrial	56.56	7	5	10	5	6	8
O43175	PHGDH	D-3-phosphoglycerate dehydrogenase	56.651	1	2	3	2	1	2
Q8N6H7	ARFGAP2	ADP-ribosylation factor GTPase-activating protein 2	56.72	2	7	6	5	2	5
P30101	PDIA3	Protein disulfide-isomerase A3	56.782	11	17	13	8	8	8
P07237	P4HB	Protein disulfide-isomerase	57.116	5	8	9	5	5	7
Q7RTS7	KRT74	Keratin, type II cytoskeletal 74	57.865	5	4	5	1	1	1
P14618	PKM	Pyruvate kinase PKM	57.937	6	6	6	5	5	5
P13645	KRT10	Keratin, type I cytoskeletal 10	58.827	52	120	75	26	21	26
P25705	ATP5F1A	ATP synthase subunit alpha, mitochondrial	59.751	9	6	9	5	5	6
P04040	CAT	Catalase	59.756	2	4	3	4	1	3
P02538	KRT6A	Keratin, type II cytoskeletal 6A	60.045	1	107	58	31	1	24
O75475	PSIP1	PC4 and SFRS1-interacting protein	60.103	4	6	7	4	3	5
P10809	HSPD1	60 kDa heat shock protein, mitochondrial	61.055	5	8	10	7	5	9
Q9NXV6	CDKN2AIP	CDKN2A-interacting protein	61.125	1	2	1	2	1	1
Q96FN4	CPNE2	Copine-2	61.19	1	1	1	1	1	1
P00367	GLUD1	Glutamate dehydrogenase 1, mitochondrial	61.398	2	2	5	1	2	3
Q13573	SNW1	SNW domain-containing protein 1	61.494	1	3	2	3	1	1
Q14247	CTTN	Src substrate cortactin	61.586	21	21	20	15	14	13
P35527	KRT9	Keratin, type I cytoskeletal 9	62.064	55	99	73	27	23	27
P13647	KRT5	Keratin, type II cytoskeletal 5	62.378	27	49	36	24	17	19
P31948	STIP1	Stress-induced-phosphoprotein 1	62.639	14	14	11	13	9	9
Q96HC4	PDLIM5	PDZ and LIM domain protein 5	63.945	1	3	4	2	1	2
Q8WXI9	GATAD2B	Transcriptional repressor p66-beta	65.261	1	7	9	5	1	5
Q9UHD8	SEPTIN9	Septin-9	65.401	3	1	1	1	1	1
P35908	KRT2	Keratin, type II cytoskeletal 2 epidermal	65.433	63	134	77	37	27	28
Q07065	CKAP4	Cytoskeleton-associated protein 4	66.022	1	3	2	1	1	2
P04264	KRT1	Keratin, type II cytoskeletal 1	66.039	88	177	122	36	27	28
Q96JB3	HIC2	Hypermethylated in cancer 2 protein	66.156	2	3	4	1	1	1
P20700	LMNB1	Lamin-B1	66.408	1	1	3	1	1	3
Q6UN15	FIP1L1	Pre-mRNA 3'-end-processing factor FIP1	66.526	6	6	7	3	2	3
Q96AE4	FUBP1	Far upstream element-binding protein 1	67.56	2	5	5	4	1	3
P27824	CANX	Calnexin	67.568	2	4	5	4	2	4
Q15637	SF1	Splicing factor 1	68.33	2	4	6	3	1	4
Q01844	EWSR1	RNA-binding protein EWS	68.478	1	3	2	2	1	2
P02771	AFP	Alpha-fetoprotein	68.678	1	1	1	1	1	1
P17844	DDX5	Probable ATP-dependent RNA helicase DDX5	69.148	1	1	1	1	1	1
P02768	ALB	Albumin	69.367	122	110	140	33	37	36
Q8NAB2	KBTBD3	Kelch repeat and BTB domain-containing protein 3	69.839	2	2	1	1	1	1
P11142	HSPA8	Heat shock cognate 71 kDa protein	70.898	14	25	26	15	10	14
P01042	KNG1	Kininogen-1	71.957	2	1	1	1	2	1
P11021	HSPA5	Endoplasmic reticulum chaperone BiP	72.333	12	19	17	13	9	10
O00571	DDX3X	ATP-dependent RNA helicase DDX3X	73.243	4	3	3	3	3	3
P38646	HSPA9	Stress-70 protein, mitochondrial	73.68	1	4	5	4	1	5
P02545	LMNA	Prelamin-A/C	74.139	11	15	20	12	9	12
Q7Z417	NUFIP2	FMR1-interacting protein NUFIP2	76.121	4	7	3	4	4	3
P23246	SFPQ	Splicing factor, proline- and glutamine-rich	76.149	2	4	5	2	2	3
P19338	NCL	Nucleolin	76.614	4	8	9	5	4	4
P02787	TF	Serotransferrin	77.05	17	18	20	14	13	13
P02788	LTF	Lactotransferrin	78.182	1	2	2	2	1	2
Q14444	CAPRIN1	Caprin-1	78.366	8	15	11	9	5	8
P14923	JUP	Junction plakoglobin	81.745	3	16	1	11	2	1
P07900	HSP90AA1	Heat shock protein HSP 90-alpha	84.66	7	6	4	4	5	3
Q9BZL4	PPP1R12C	Protein phosphatase 1 regulatory subunit 12C	84.881	1	2	2	2	1	2
P06396	GSN	Gelsolin	85.698	3	3	2	3	2	2
Q15459	SF3A1	Splicing factor 3A subunit 1	88.886	1	2	2	1	1	1
P55072	VCP	Transitional endoplasmic reticulum ATPase	89.322	1	4	3	3	1	3
Q00839	HNRNPU	Heterogeneous nuclear ribonucleoprotein U	90.584	13	11	10	8	12	6
P14625	HSP90B1	Endoplasmin	92.469	3	5	4	4	2	3
Q05682	CALD1	Caldesmon	93.231	4	8	10	7	4	9
P02671	FGA	Fibrinogen alpha chain	94.973	11	9	12	5	7	7
P13639	EEF2	Elongation factor 2	95.338	1	1	3	1	1	2
P01130	LDLR	Low-density lipoprotein receptor	95.376	1	1	1	1	1	1
Q08554	DSC1	Desmocollin-1	99.987	3	11	2	7	2	2
Q14624	ITIH4	Inter-alpha-trypsin inhibitor heavy chain H4	103.357	1	1	1	1	1	1
P19823	ITIH2	Inter-alpha-trypsin inhibitor heavy chain H2	106.463	3	5	5	3	3	3
Q96T37	RBM15	RNA-binding protein 15	107.189	1	3	1	2	1	1
O60716	CTNND1	Catenin delta-1	108.17	2	3	4	2	2	2
P33176	KIF5B	Kinesin-1 heavy chain	109.685	1	6	3	5	1	2
O14983	ATP2A1	Sarcoplasmic/endoplasmic reticulum calcium ATPase 1	110.252	2	1	1	1	1	1
Q02413	DSG1	Desmoglein-1	113.748	8	22	10	12	6	6
O14974	PPP1R12A	Protein phosphatase 1 regulatory subunit 12A	115.281	7	11	7	7	5	5
Q5T6F2	UBAP2	Ubiquitin-associated protein 2	117.116	1	2	2	1	1	1
P27816	MAP4	Microtubule-associated protein 4	121.005	3	3	2	3	3	2
P08123	COL1A2	Collagen alpha-2(I) chain	129.314	15	10	10	7	7	7
O94979	SEC31A	Protein transport protein Sec31A	133.015	1	2	1	2	1	1
P02452	COL1A1	Collagen alpha-1(I) chain	138.911	15	12	15	9	9	9
P01023	A2M	Alpha-2-macroglobulin	163.291	11	9	11	7	10	9
P01024	C3	Complement C3	187.148	9	12	10	9	8	9
P0C0L4	C4A	Complement C4-A	192.785	4	4	5	3	3	4
Q9H792	PEAK1	Inactive tyrosine-protein kinase PEAK1	193.106	1	1	1	1	1	1
Q07157	TJP1	Tight junction protein ZO-1	195.459	3	3	5	3	3	3
E9PAV3	NACA	Nascent polypeptide-associated complex subunit alpha, muscle-specific form	205.422	39	55	74	6	6	6
Q9Y623	MYH4	Myosin-4	223.071	8	19	7	15	5	5
P12882	MYH1	Myosin-1	223.145	20	3	23	2	17	17
P35579	MYH9	Myosin-9	226.532	23	17	6	14	16	6
P35749	MYH11	Myosin-11	227.339	6	7	5	5	5	5
Q5D862	FLG2	Filaggrin-2	248.073	2	11	2	8	2	2
P46821	MAP1B	Microtubule-associated protein 1B	270.634	3	3	3	2	2	2
P21333	FLNA	Filamin-A	280.739	25	19	26	17	19	20
Q86YZ3	HRNR	Hornerin	282.39	11	25	16	13	10	10
P15924	DSP	Desmoplakin	331.774	6	52	6	46	6	6
Q09666	AHNAK	Neuroblast differentiation-associated protein AHNAK	629.101	7	16	14	12	6	12

## Sheet: Table S2
Full lists of protein targets of the PIP-2 group (n=3)
ProteinAccessions	Genes	ProteinDescriptions	Mass（KD）	PSMs			UniquePeptides
				PIP-2 2_1	PIP-2 2_2	PIP-2 2_3	PIP-2 2_1	PIP-2 2_2	PIP-2 2_3
P63313	TMSB10	Thymosin beta-10	5.026	5	6	6	3	3	3
P62328	TMSB4X	Thymosin beta-4	5.053	11	12	6	3	4	3
P02795	MT2A	Metallothionein-2	6.042	3	3	1	3	2	1
P04733	MT1F	Metallothionein-1F	6.086	1	1	1	1	1	1
P62857	RPS28	Small ribosomal subunit protein eS28	7.841	1	1	1	1	1	1
P06703	S100A6	Protein S100-A6	10.18	1	3	1	1	2	1
P59665	DEFA1	Neutrophil defensin 1	10.201	2	1	1	1	1	1
Q9H299	SH3BGRL3	SH3 domain-binding glutamic acid-rich-like protein 3	10.438	1	1	1	1	1	1
P61604	HSPE1	10 kDa heat shock protein, mitochondrial	10.932	6	4	1	3	3	1
P01040	CSTA	Cystatin-A	11.006	4	4	3	3	3	2
P02652	APOA2	Apolipoprotein A-II	11.175	3	1	16	3	1	4
P81605	DCD	Dermcidin	11.284	8	5	5	4	3	2
P0DOY2	IGLC2	Immunoglobulin lambda constant 2	11.294	4	8	21	1	3	4
P62805	H4C1	Histone H4	11.367	7	13	6	4	5	4
P20962	PTMS	Parathymosin	11.53	2	1	2	1	1	1
P26447	S100A4	Protein S100-A4	11.729	3	2	2	2	2	2
P10599	TXN	Thioredoxin	11.737	4	3	2	3	3	2
P01834	IGKC	Immunoglobulin kappa constant	11.765	2	1	15	1	1	2
P06454	PTMA	Prothymosin alpha	12.203	3	7	3	3	3	3
A0A0C4DH25	IGKV3D-20	Immunoglobulin kappa variable 3D-20	12.515	2	2	3	1	1	1
P06702	S100A9	Protein S100-A9	13.242	1	2	1	1	1	1
O60814	H2BC12	Histone H2B type 1-K	13.89	7	8	4	3	3	2
P25398	RPS12	Small ribosomal subunit protein eS12	14.515	2	1	1	2	1	1
P09382	LGALS1	Galectin-1	14.716	4	4	1	3	3	1
Q15121	PEA15	Astrocytic phosphoprotein PEA-15	15.04	1	1	1	1	1	1
P07737	PFN1	Profilin-1	15.054	1	2	2	1	2	2
P69905	HBA1	Hemoglobin subunit alpha	15.258	21	22	20	5	5	4
Q96EE4	CCDC126	Coiled-coil domain-containing protein 126	15.668	4	6	4	2	4	3
Q9NZT1	CALML5	Calmodulin-like protein 5	15.893	4	3	4	3	2	2
P68871	HBB	Hemoglobin subunit beta	15.998	17	22	14	6	8	8
P39019	RPS19	Small ribosomal subunit protein eS19	16.06	3	3	1	2	2	1
P62263	RPS14	Small ribosomal subunit protein uS11	16.273	3	1	1	2	1	1
P61626	LYZ	Lysozyme C	16.537	1	1	4	1	1	3
P0DP23	CALM1	Calmodulin-1	16.838	9	7	8	6	5	6
P60660	MYL6	Myosin light polypeptide 6	16.93	7	5	9	5	3	5
P16949	STMN1	Stathmin	17.303	3	4	1	3	3	1
P62750	RPL23A	Large ribosomal subunit protein uL23	17.695	1	1	2	1	1	2
P30050	RPL12	Large ribosomal subunit protein uL11	17.819	1	2	1	1	1	1
P62937	PPIA	Peptidyl-prolyl cis-trans isomerase A	18.012	3	4	4	2	2	3
P23528	CFL1	Cofilin-1	18.502	11	15	8	6	7	5
P60981	DSTN	Destrin	18.506	2	3	1	2	2	1
Q15185	PTGES3	Prostaglandin E synthase 3	18.697	1	1	1	1	1	1
Q96A32	MYL11	Myosin regulatory light chain 11	19.015	3	4	1	2	3	1
P62633	CNBP	CCHC-type zinc finger nucleic acid binding protein	19.463	6	6	1	3	4	1
P49006	MARCKSL1	MARCKS-related protein	19.529	3	2	2	2	1	2
O14950	MYL12B	Myosin regulatory light chain 12B	19.779	2	3	2	2	3	2
P24844	MYL9	Myosin regulatory light polypeptide 9	19.827	1	1	1	1	1	1
O00193	SMAP	Small acidic protein	20.333	11	9	9	3	3	3
P21291	CSRP1	Cysteine and glycine-rich protein 1	20.567	2	1	1	2	1	1
Q13442	PDAP1	28 kDa heat- and acid-stable phosphoprotein	20.63	4	4	4	2	4	3
Q9Y2B0	CNPY2	Protein canopy homolog 2	20.652	1	1	1	1	1	1
P30086	PEBP1	Phosphatidylethanolamine-binding protein 1	21.057	3	1	1	1	1	1
P05976	MYL1	Myosin light chain 1/3, skeletal muscle isoform	21.145	3	5	3	3	3	3
P84157	MXRA7	Matrix-remodeling-associated protein 7	21.466	14	12	10	2	2	2
Q96DD7	SHISA4	Protein shisa-4	21.522	1	1	1	1	1	1
O00264	PGRMC1	Membrane-associated progesterone receptor component 1	21.671	2	1	1	1	1	1
O43583	DENR	Density-regulated protein	22.092	1	1	1	1	1	1
Q06830	PRDX1	Peroxiredoxin-1	22.11	11	6	12	7	5	8
Q9H3Z4	DNAJC5	DnaJ homolog subfamily C member 5	22.149	15	12	12	5	3	5
O43399	TPD52L2	Tumor protein D54	22.238	4	6	5	4	4	5
Q14919	DRAP1	Dr1-associated corepressor	22.35	5	7	4	3	4	3
P37802	TAGLN2	Transgelin-2	22.391	11	15	11	6	7	7
P46781	RPS9	Small ribosomal subunit protein uS4	22.591	4	4	2	4	4	2
Q01995	TAGLN	Transgelin	22.611	10	11	20	9	8	9
Q9Y3E1	HDGFL3	Hepatoma-derived growth factor-related protein 3	22.62	1	3	1	1	2	1
O60936	NOL3	Nucleolar protein 3	22.629	2	1	1	1	1	1
P80723	BASP1	Brain acid soluble protein 1	22.693	1	3	1	1	2	1
P04792	HSPB1	Heat shock protein beta-1	22.783	2	3	5	2	3	5
P41236	PPP1R2	Protein phosphatase inhibitor 2	23.015	4	4	5	2	2	2
O76080	ZFAND5	AN1-type zinc finger protein 5	23.132	7	4	1	4	4	1
P43487	RANBP1	Ran-specific GTPase-activating protein	23.31	8	6	8	5	4	5
O00161	SNAP23	Synaptosomal-associated protein 23	23.354	1	2	1	1	1	1
P0DOX7	NaN	Immunoglobulin kappa light chain	23.379	9	8	79	4	4	10
Q8WUZ0	BCL7C	B-cell CLL/lymphoma 7 protein family member C	23.468	2	4	3	2	2	2
P02763	ORM1	Alpha-1-acid glycoprotein 1	23.54	2	2	2	2	1	2
P82979	SARNP	SAP domain-containing ribonucleoprotein	23.671	27	31	21	8	8	8
Q8N128	FAM177A1	Protein FAM177A1	23.757	5	4	5	4	4	2
Q9UQN3	CHMP2B	Charged multivesicular body protein 2b	23.907	4	7	4	3	5	3
P62241	RPS8	Small ribosomal subunit protein eS8	24.205	3	1	1	3	1	1
B2RPK0	HMGB1P1	Putative high mobility group protein B1-like 1	24.238	6	7	6	5	5	5
P26373	RPL13	Large ribosomal subunit protein eL13	24.261	12	4	5	7	3	5
P55327	TPD52	Tumor protein D52	24.327	2	3	3	2	2	2
O00559	EBAG9	Receptor-binding cancer antigen expressed on SiSo cells	24.377	2	1	1	2	1	1
Q9HD15	SRA1	Steroid receptor RNA activator 1	24.4	11	7	10	5	4	5
Q9NZZ3	CHMP5	Charged multivesicular body protein 5	24.571	7	9	10	4	4	4
P24534	EEF1B2	Elongation factor 1-beta	24.764	14	22	17	8	7	7
Q8N488	RYBP	RING1 and YY1-binding protein	24.822	24	24	17	10	9	6
P09936	UCHL1	Ubiquitin carboxyl-terminal hydrolase isozyme L1	24.824	2	2	2	2	2	2
Q9H444	CHMP4B	Charged multivesicular body protein 4b	24.95	14	8	8	6	6	6
Q00688	FKBP3	Peptidyl-prolyl cis-trans isomerase FKBP3	25.177	3	3	2	3	3	2
P09497	CLTB	Clathrin light chain B	25.19	10	5	8	7	5	5
Q96MW1	CCDC43	Coiled-coil domain-containing protein 43	25.248	2	2	1	2	2	1
Q01130	SRSF2	Serine/arginine-rich splicing factor 2	25.476	22	18	18	6	6	6
P0CG47	UBB	Polyubiquitin-B	25.762	14	16	8	4	5	4
Q96CT7	CCDC124	Coiled-coil domain-containing protein 124	25.835	10	13	6	3	3	2
P08294	SOD3	Extracellular superoxide dismutase [Cu-Zn]	25.851	1	1	1	1	1	1
Q9BVC5	C2orf49	Ashwin	25.858	2	2	3	1	1	1
O75391	SPAG7	Sperm-associated antigen 7	26.034	3	7	2	3	4	2
P36543	ATP6V1E1	V-type proton ATPase subunit E 1	26.145	3	5	3	1	3	2
Q9NX63	CHCHD3	MICOS complex subunit MIC19	26.152	2	2	3	2	2	3
P54105	CLNS1A	Methylosome subunit pICln	26.215	8	8	6	2	2	2
O95999	BCL10	B-cell lymphoma/leukemia 10	26.252	9	3	4	5	3	4
Q9Y3Y2	CHTOP	Chromatin target of PRMT1 protein	26.397	5	5	2	3	2	2
Q96CF2	CHMP4C	Charged multivesicular body protein 4c	26.411	3	3	2	2	2	2
P54819	AK2	Adenylate kinase 2, mitochondrial	26.478	2	1	1	1	1	1
P07477	PRSS1	Serine protease 1	26.558	6	9	7	2	2	2
Q9P013	CWC15	Spliceosome-associated protein CWC15 homolog	26.624	16	15	13	9	9	7
P60174	TPI1	Triosephosphate isomerase	26.669	3	7	4	3	4	3
P23396	RPS3	Small ribosomal subunit protein uS3	26.688	10	8	9	7	4	4
Q96C19	EFHD2	EF-hand domain-containing protein D2	26.697	34	49	31	11	10	12
O75940	SMNDC1	Survival of motor neuron-related-splicing factor 30	26.711	7	13	9	5	8	6
P51858	HDGF	Hepatoma-derived growth factor	26.788	7	6	5	3	2	3
Q86V81	ALYREF	THO complex subunit 4	26.888	43	81	30	10	8	9
O00299	CLIC1	Chloride intracellular channel protein 1	26.923	3	7	5	3	5	4
P09496	CLTA	Clathrin light chain A	27.077	23	23	28	7	7	7
Q9UKY7	CDV3	Protein CDV3 homolog	27.335	11	10	13	5	5	5
Q16629	SRSF7	Serine/arginine-rich splicing factor 7	27.367	8	3	5	5	2	4
Q15056	EIF4H	Eukaryotic translation initiation factor 4H	27.385	34	40	33	15	15	10
Q9H2J4	PDCL3	Phosducin-like protein 3	27.614	8	5	4	4	3	2
Q9NX40	OCIAD1	OCIA domain-containing protein 1	27.626	9	6	9	5	4	4
P04156	PRNP	Major prion protein	27.661	2	2	1	2	1	1
P31944	CASP14	Caspase-14	27.68	3	3	5	3	3	4
P63104	YWHAZ	14-3-3 protein zeta/delta	27.745	10	12	6	6	7	5
Q07955	SRSF1	Serine/arginine-rich splicing factor 1	27.745	29	31	21	14	11	13
P27348	YWHAQ	14-3-3 protein theta	27.764	12	14	10	10	9	6
Q9H446	RWDD1	RWD domain-containing protein 1	27.94	2	6	6	1	5	5
P51572	BCAP31	B-cell receptor-associated protein 31	27.992	1	1	1	1	1	1
P62917	RPL8	Large ribosomal subunit protein uL2	28.025	10	10	7	7	7	6
P31946	YWHAB	14-3-3 protein beta/alpha	28.082	2	4	1	2	2	1
O00287	RFXAP	Regulatory factor X-associated protein	28.232	2	5	2	2	2	1
P61981	YWHAG	14-3-3 protein gamma	28.303	2	2	1	1	2	1
P13984	GTF2F2	General transcription factor IIF subunit 2	28.38	6	4	1	5	3	1
P67936	TPM4	Tropomyosin alpha-4 chain	28.522	43	45	128	12	15	26
P62753	RPS6	Small ribosomal subunit protein eS6	28.681	8	5	7	5	3	5
O95926	SYF2	Pre-mRNA-splicing factor SYF2	28.722	1	1	1	1	1	1
Q06323	PSME1	Proteasome activator complex subunit 1	28.723	7	9	5	6	6	3
P12004	PCNA	Proliferating cell nuclear antigen	28.769	18	26	17	9	10	8
Q92688	ANP32B	Acidic leucine-rich nuclear phosphoprotein 32 family member B	28.788	7	12	6	2	2	2
Q9GZU8	PSME3IP1	PSME3-interacting protein	28.912	4	3	3	3	2	3
O95721	SNAP29	Synaptosomal-associated protein 29	28.97	13	18	11	4	4	4
Q16594	TAF9	Transcription initiation factor TFIID subunit 9	28.974	8	8	4	6	8	3
P30040	ERP29	Endoplasmic reticulum resident protein 29	28.993	1	2	2	1	2	2
P50402	EMD	Emerin	28.994	5	7	3	3	3	3
O75822	EIF3J	Eukaryotic translation initiation factor 3 subunit J	29.062	17	31	21	9	9	8
Q96G25	MED8	Mediator of RNA polymerase II transcription subunit 8	29.08	2	5	3	2	2	2
Q16270	IGFBP7	Insulin-like growth factor-binding protein 7	29.13	3	5	1	2	3	1
P62258	YWHAE	14-3-3 protein epsilon	29.174	14	23	15	11	13	10
O43752	STX6	Syntaxin-6	29.176	3	6	3	3	4	2
P18846	ATF1	Cyclic AMP-dependent transcription factor ATF-1	29.233	7	7	4	6	6	3
P25786	PSMA1	Proteasome subunit alpha type-1	29.556	8	8	8	5	6	5
P62701	RPS4X	Small ribosomal subunit protein eS4, X isoform	29.598	3	6	2	2	4	1
Q14847	LASP1	LIM and SH3 domain protein 1	29.717	27	23	30	13	11	12
O75937	DNAJC8	DnaJ homolog subfamily C member 8	29.842	26	17	18	13	11	10
Q8WXX5	DNAJC9	DnaJ homolog subfamily C member 9	29.91	4	5	3	2	3	3
P61247	RPS3A	Small ribosomal subunit protein eS1	29.945	16	10	10	9	9	8
P62424	RPL7A	Large ribosomal subunit protein eL8	29.996	5	2	2	3	2	2
Q15691	MAPRE1	Microtubule-associated protein RP/EB family member 1	29.999	5	3	2	4	3	2
Q9UBV8	PEF1	Peflin	30.381	1	1	2	1	1	2
O60828	PQBP1	Polyglutamine-binding protein 1	30.472	2	2	4	2	1	3
P47756	CAPZB	F-actin-capping protein subunit beta	30.629	3	5	3	2	4	2
Q9BTT0	ANP32E	Acidic leucine-rich nuclear phosphoprotein 32 family member E	30.692	4	3	11	2	3	4
Q9BT09	CNPY3	Protein canopy homolog 3	30.748	10	6	5	6	3	3
P21796	VDAC1	Voltage-dependent anion-selective channel protein 1	30.773	10	13	14	6	8	9
P02647	APOA1	Apolipoprotein A-I	30.778	18	17	134	11	11	31
Q13151	HNRNPA0	Heterogeneous nuclear ribonucleoprotein A0	30.841	2	1	2	1	1	1
P29692	EEF1D	Elongation factor 1-delta	31.122	16	22	13	8	8	5
O94760	DDAH1	N(G),N(G)-dimethylarginine dimethylaminohydrolase 1	31.122	21	9	16	9	7	7
Q13643	FHL3	Four and a half LIM domains protein 3	31.192	5	3	3	4	3	2
Q13243	SRSF5	Serine/arginine-rich splicing factor 5	31.264	4	3	4	4	2	3
P09012	SNRPA	U1 small nuclear ribonucleoprotein A	31.28	6	4	2	4	3	2
Q96FW1	OTUB1	Ubiquitin thioesterase OTUB1	31.284	5	4	3	3	2	3
P15880	RPS2	Small ribosomal subunit protein uS5	31.324	6	6	7	6	4	4
P48739	PITPNB	Phosphatidylinositol transfer protein beta isoform	31.54	1	2	1	1	2	1
P45880	VDAC2	Voltage-dependent anion-selective channel protein 2	31.567	4	6	5	4	5	5
O00625	PIR	Pirin	32.113	1	1	1	1	1	1
Q14192	FHL2	Four and a half LIM domains protein 2	32.193	8	8	6	6	6	4
Q14165	MLEC	Malectin	32.234	1	1	2	1	1	2
P43307	SSR1	Translocon-associated protein subunit alpha	32.235	10	10	11	3	3	3
O43396	TXNL1	Thioredoxin-like protein 1	32.251	6	2	1	2	2	1
Q96F24	NRBF2	Nuclear receptor-binding factor 2	32.378	3	1	2	2	1	2
P35030	PRSS3	Trypsin-3	32.529	4	3	4	1	1	1
P06748	NPM1	Nucleophosmin	32.575	5	5	6	3	3	3
P09493	TPM1	Tropomyosin alpha-1 chain	32.709	19	28	22	11	15	16
O95983	MBD3	Methyl-CpG-binding domain protein 3	32.844	5	2	3	3	2	2
P07951	TPM2	Tropomyosin beta chain	32.851	21	8	8	13	5	6
P06753	TPM3	Tropomyosin alpha-3 chain	32.95	173	199	93	25	25	8
P51911	CNN1	Calponin-1	33.17	3	4	1	3	4	1
Q9Y314	NOSIP	Nitric oxide synthase-interacting protein	33.172	6	3	1	5	3	1
Q9NWB6	ARGLU1	Arginine and glutamate-rich protein 1	33.216	2	4	2	2	2	2
P54920	NAPA	Alpha-soluble NSF attachment protein	33.233	6	5	2	4	4	2
Q99623	PHB2	Prohibitin-2	33.296	12	4	5	7	3	5
Q04323	UBXN1	UBX domain-containing protein 1	33.325	4	3	5	4	3	4
Q9UNP9	PPIE	Peptidyl-prolyl cis-trans isomerase E	33.431	8	3	1	6	3	1
P07910	HNRNPC	Heterogeneous nuclear ribonucleoproteins C1/C2	33.67	1	2	2	1	1	1
Q9NZ63	C9orf78	Splicing factor C9orf78	33.688	3	2	4	2	1	4
Q99439	CNN2	Calponin-2	33.697	13	8	8	6	5	5
Q8NBJ7	SUMF2	Inactive C-alpha-formylglycine-generating enzyme 2	33.843	8	6	6	5	5	4
P23193	TCEA1	Transcription elongation factor A protein 1	33.97	7	6	9	5	5	7
O43765	SGTA	Small glutamine-rich tetratricopeptide repeat-containing protein alpha	34.063	6	5	6	4	3	4
P06493	CDK1	Cyclin-dependent kinase 1	34.095	2	1	1	1	1	1
P05388	RPLP0	Large ribosomal subunit protein uL10	34.274	4	6	6	3	5	4
O15144	ARPC2	Actin-related protein 2/3 complex subunit 2	34.333	1	2	1	1	2	1
Q12904	AIMP1	Aminoacyl tRNA synthase complex-interacting multifunctional protein 1	34.353	1	1	6	1	1	3
O00487	PSMD14	26S proteasome non-ATPase regulatory subunit 14	34.577	1	1	1	1	1	1
P09486	SPARC	SPARC	34.632	4	1	7	4	1	4
Q9UNE7	STUB1	E3 ubiquitin-protein ligase CHIP	34.856	8	9	8	7	7	5
Q96AG4	LRRC59	Leucine-rich repeat-containing protein 59	34.93	6	1	5	5	1	3
P63244	RACK1	Small ribosomal subunit protein RACK1	35.077	16	15	15	10	8	9
P17535	JUND	Transcription factor JunD	35.174	5	3	4	3	2	3
P15408	FOSL2	Fos-related antigen 2	35.193	4	1	3	3	1	2
Q9Y448	KNSTRN	Small kinetochore-associated protein	35.438	4	3	2	4	3	2
P40926	MDH2	Malate dehydrogenase, mitochondrial	35.503	21	17	18	12	11	11
Q96HY6	DDRGK1	DDRGK domain-containing protein 1	35.611	2	2	3	2	1	2
O75821	EIF3G	Eukaryotic translation initiation factor 3 subunit G	35.611	6	5	5	4	3	4
P09525	ANXA4	Annexin A4	35.883	10	7	5	6	4	5
P67809	YBX1	Y-box-binding protein 1	35.924	2	1	2	2	1	2
P08758	ANXA5	Annexin A5	35.937	10	7	5	6	6	4
P04406	GAPDH	Glyceraldehyde-3-phosphate dehydrogenase	36.053	8	5	19	5	4	7
O00151	PDLIM1	PDZ and LIM domain protein 1	36.072	12	12	10	4	6	5
Q15717	ELAVL1	ELAV-like protein 1	36.092	3	2	1	3	2	1
Q99729	HNRNPAB	Heterogeneous nuclear ribonucleoprotein A/B	36.225	6	11	14	5	6	6
P12429	ANXA3	Annexin A3	36.375	1	1	2	1	1	1
P40925	MDH1	Malate dehydrogenase, cytoplasmic	36.426	3	2	1	2	1	1
P07195	LDHB	L-lactate dehydrogenase B chain	36.638	1	1	1	1	1	1
P00338	LDHA	L-lactate dehydrogenase A chain	36.689	7	7	6	5	5	5
Q9NQG5	RPRD1B	Regulation of nuclear pre-mRNA domain-containing protein 1B	36.9	1	1	1	1	1	1
O43852	CALU	Calumenin	37.107	19	15	18	6	5	5
P22626	HNRNPA2B1	Heterogeneous nuclear ribonucleoproteins A2/B1	37.43	94	120	87	19	17	17
Q96D15	RCN3	Reticulocalbin-3	37.493	5	5	3	2	3	3
O95400	CD2BP2	CD2 antigen cytoplasmic tail-binding protein 2	37.646	2	2	3	2	2	2
O00170	AIP	AH receptor-interacting protein	37.664	2	1	2	2	1	2
P20042	EIF2S2	Eukaryotic translation initiation factor 2 subunit 2	38.388	1	3	2	1	2	2
P51884	LUM	Lumican	38.429	1	1	6	1	1	4
Q14103	HNRNPD	Heterogeneous nuclear ribonucleoprotein D0	38.434	9	13	18	6	7	9
P07355	ANXA2	Annexin A2	38.604	10	9	20	9	6	11
P04083	ANXA1	Annexin A1	38.714	5	7	4	5	6	4
P09651	HNRNPA1	Heterogeneous nuclear ribonucleoprotein A1	38.747	43	48	33	13	13	13
O14745	NHERF1	Na(+)/H(+) exchange regulatory cofactor NHE-RF1	38.868	6	4	2	3	2	1
P02765	AHSG	Alpha-2-HS-glycoprotein	39.341	4	4	14	3	3	6
P04075	ALDOA	Fructose-bisphosphate aldolase A	39.42	8	6	4	6	4	4
P05062	ALDOB	Fructose-bisphosphate aldolase B	39.473	2	1	3	1	1	1
P51991	HNRNPA3	Heterogeneous nuclear ribonucleoprotein A3	39.595	43	54	36	11	11	9
Q9NSC5	HOMER3	Homer protein homolog 3	39.836	1	1	1	1	1	1
P16989	YBX3	Y-box-binding protein 3	40.09	15	4	8	6	3	5
Q00325	SLC25A3	Solute carrier family 25 member 3	40.095	2	2	1	2	2	1
Q96PM9	ZNF385A	Zinc finger protein 385A	40.454	1	1	1	1	1	1
Q9UNZ2	NSFL1C	NSFL1 cofactor p47	40.573	11	9	13	8	7	10
P55036	PSMD4	26S proteasome non-ATPase regulatory subunit 4	40.737	4	2	4	4	2	3
Q9BYG4	PARD6G	Partitioning defective 6 homolog gamma	40.883	2	1	1	1	1	1
P50502	ST13	Hsc70-interacting protein	41.332	2	1	1	2	1	1
O43251	RBFOX2	RNA binding protein fox-1 homolog 2	41.374	4	2	4	4	2	4
P52655	GTF2A1	Transcription initiation factor IIA subunit 1	41.514	2	1	1	2	1	1
P60709	ACTB	Actin, cytoplasmic 1	41.737	49	58	15	17	16	5
P62736	ACTA2	Actin, aortic smooth muscle	42.009	14	7	42	4	3	14
P38159	RBMX	RNA-binding motif protein, X chromosome	42.332	7	7	4	3	4	3
P01876	IGHA1	Immunoglobulin heavy constant alpha 1	42.849	4	6	16	3	3	6
P17246	TGFB1	Transforming growth factor beta-1 proprotein	44.3001	5	4	4	4	4	3
P06732	CKM	Creatine kinase M-type	43.101	2	5	3	2	4	3
P54727	RAD23B	UV excision repair protein RAD23 homolog B	43.171	4	3	8	4	2	6
P18615	NELFE	Negative elongation factor E	43.24	2	1	1	1	1	1
Q9HC52	CBX8	Chromobox protein homolog 8	43.396	3	2	1	2	2	1
Q6NZI2	CAVIN1	Caveolae-associated protein 1	43.476	17	20	15	9	8	8
P01859	IGHG2	Immunoglobulin heavy constant gamma 2	43.806	7	5	31	5	2	6
Q13561	DCTN2	Dynactin subunit 2	44.231	6	2	4	3	2	4
Q16543	CDC37	Hsp90 co-chaperone Cdc37	44.468	4	1	3	3	1	2
P29558	RBMS1	RNA-binding motif, single-stranded-interacting protein 1	44.505	7	4	2	4	3	1
P07339	CTSD	Cathepsin D	44.552	4	1	1	3	1	1
P00558	PGK1	Phosphoglycerate kinase 1	44.615	4	1	2	3	1	2
Q8NC51	SERBP1	SERPINE1 mRNA-binding protein 1	44.965	19	22	23	13	14	15
P00738	HP	Haptoglobin	45.205	14	10	40	11	8	12
Q9BY77	POLDIP3	Polymerase delta-interacting protein 3	46.089	4	4	2	2	3	2
Q96P63	SERPINB12	Serpin B12	46.276	2	4	4	1	3	4
O14979	HNRNPDL	Heterogeneous nuclear ribonucleoprotein D-like	46.438	7	2	2	6	2	2
P50454	SERPINH1	Serpin H1	46.441	2	1	1	1	1	1
Q9Y383	LUC7L2	Putative RNA-binding protein Luc7-like 2	46.514	8	4	3	8	3	2
P01009	SERPINA1	Alpha-1-antitrypsin	46.737	13	12	39	8	9	20
P06733	ENO1	Alpha-enolase	47.169	5	9	8	3	6	4
Q04695	KRT17	Keratin, type I cytoskeletal 17	48.106	3	5	19	3	5	13
Q15084	PDIA6	Protein disulfide-isomerase A6	48.121	2	3	4	1	3	3
Q9UJU6	DBNL	Drebrin-like protein	48.207	15	12	15	7	6	8
Q8WU90	ZC3H15	Zinc finger CCCH domain-containing protein 15	48.602	1	1	1	1	1	1
P07437	TUBB	Tubulin beta chain	49.671	6	1	5	4	1	5
Q9NR12	PDLIM7	PDZ and LIM domain protein 7	49.845	2	1	3	1	1	2
P26641	EEF1G	Elongation factor 1-gamma	50.119	11	6	3	8	5	2
P68104	EEF1A1	Elongation factor 1-alpha 1	50.141	11	12	13	8	6	8
Q9UKX7	NUP50	Nuclear pore complex protein Nup50	50.144	2	1	2	2	1	1
P68363	TUBA1B	Tubulin alpha-1B chain	50.152	7	4	4	6	3	3
Q6KB66	KRT80	Keratin, type II cytoskeletal 80	50.525	1	5	9	1	3	7
P42167	TMPO	Lamina-associated polypeptide 2, isoforms beta/gamma	50.67	6	6	8	4	4	6
Q16181	SEPTIN7	Septin-7	50.68	2	3	2	2	3	2
O43670	ZNF207	BUB3-interacting and GLEBS motif-containing protein ZNF207	50.751	5	1	4	3	1	3
P61978	HNRNPK	Heterogeneous nuclear ribonucleoprotein K	50.976	21	24	28	13	11	11
P08779	KRT16	Keratin, type I cytoskeletal 16	51.268	2	10	15	2	5	6
Q92743	HTRA1	Serine protease HTRA1	51.287	3	5	4	3	5	3
P02679	FGG	Fibrinogen gamma chain	51.512	4	2	2	4	2	2
Q15517	CDSN	Corneodesmosin	51.522	1	1	2	1	1	2
P02533	KRT14	Keratin, type I cytoskeletal 14	51.561	25	46	63	16	23	28
P01871	IGHM	Immunoglobulin heavy constant mu	51.924	3	3	7	3	2	3
Q13283	G3BP1	Ras GTPase-activating protein-binding protein 1	52.164	4	2	6	2	2	3
P10909	CLU	Clusterin	52.495	1	1	25	1	1	12
P01008	SERPINC1	Antithrombin-III	52.602	5	3	14	5	3	11
P35637	FUS	RNA-binding protein FUS	53.426	19	18	21	6	5	6
P17661	DES	Desmin	53.536	12	14	15	11	13	13
P08670	VIM	Vimentin	53.652	23	17	8	15	11	7
Q02818	NUCB1	Nucleobindin-1	53.879	3	7	7	3	5	5
Q15233	NONO	Non-POU domain-containing octamer-binding protein	54.232	5	2	6	2	2	3
P04004	VTN	Vitronectin	54.306	1	2	38	1	2	11
P02675	FGB	Fibrinogen beta chain	55.928	1	1	2	1	1	2
P06576	ATP5F1B	ATP synthase subunit beta, mitochondrial	56.56	7	8	12	5	6	7
O43175	PHGDH	D-3-phosphoglycerate dehydrogenase	56.651	5	1	3	5	1	3
Q8N6H7	ARFGAP2	ADP-ribosylation factor GTPase-activating protein 2	56.72	8	9	8	7	6	6
P30101	PDIA3	Protein disulfide-isomerase A3	56.782	15	17	12	8	9	9
Q8N1N4	KRT78	Keratin, type II cytoskeletal 78	56.866	2	8	8	2	7	8
P07237	P4HB	Protein disulfide-isomerase	57.116	15	13	11	9	10	10
P14618	PKM	Pyruvate kinase PKM	57.937	6	6	6	5	5	5
P13645	KRT10	Keratin, type I cytoskeletal 10	58.827	43	107	181	22	25	30
P04196	HRG	Histidine-rich glycoprotein	59.578	1	1	8	1	1	7
P25705	ATP5F1A	ATP synthase subunit alpha, mitochondrial	59.751	5	9	5	5	6	5
P04040	CAT	Catalase	59.756	1	3	3	1	3	3
P02538	KRT6A	Keratin, type II cytoskeletal 6A	60.045	1	2	147	1	1	38
O75475	PSIP1	PC4 and SFRS1-interacting protein	60.103	6	11	9	4	7	6
Q9UQB8	BAIAP2	Brain-specific angiogenesis inhibitor 1-associated protein 2	60.868	2	1	3	2	1	3
P10809	HSPD1	60 kDa heat shock protein, mitochondrial	61.055	11	9	12	9	6	10
Q9NXV6	CDKN2AIP	CDKN2A-interacting protein	61.125	1	1	2	1	1	2
Q13573	SNW1	SNW domain-containing protein 1	61.494	4	5	4	3	4	3
Q14247	CTTN	Src substrate cortactin	61.586	30	22	24	17	12	13
O95817	BAG3	BAG family molecular chaperone regulator 3	61.595	3	2	7	3	2	4
P35527	KRT9	Keratin, type I cytoskeletal 9	62.064	48	83	156	19	24	32
P13647	KRT5	Keratin, type II cytoskeletal 5	62.378	15	35	76	10	22	32
P31948	STIP1	Stress-induced-phosphoprotein 1	62.639	21	19	19	14	13	13
Q86UE4	MTDH	Protein LYRIC	63.837	4	1	2	2	1	2
Q96HC4	PDLIM5	PDZ and LIM domain protein 5	63.945	7	5	9	4	3	6
Q5T749	KPRP	Keratinocyte proline-rich protein	64.136	1	3	8	1	2	4
O00499	BIN1	Myc box-dependent-interacting protein 1	64.699	2	2	1	1	1	1
Q8WXI9	GATAD2B	Transcriptional repressor p66-beta	65.261	9	7	10	7	6	7
Q9UHD8	SEPTIN9	Septin-9	65.401	1	2	2	1	2	2
P35908	KRT2	Keratin, type II cytoskeletal 2 epidermal	65.433	38	127	127	20	36	38
Q07065	CKAP4	Cytoskeleton-associated protein 4	66.022	6	3	4	6	3	3
P04264	KRT1	Keratin, type II cytoskeletal 1	66.039	71	132	200	26	33	48
Q96JB3	HIC2	Hypermethylated in cancer 2 protein	66.156	2	5	3	1	1	1
P20700	LMNB1	Lamin-B1	66.408	3	4	4	2	3	3
Q8N8S7	ENAH	Protein enabled homolog	66.51	4	5	2	4	4	2
Q6UN15	FIP1L1	Pre-mRNA 3'-end-processing factor FIP1	66.526	7	8	6	3	2	3
Q96HN2	AHCYL2	Adenosylhomocysteinase 3	66.721	2	2	1	2	2	1
Q96AE4	FUBP1	Far upstream element-binding protein 1	67.56	8	4	7	5	4	6
P27824	CANX	Calnexin	67.568	5	5	3	4	4	3
P26038	MSN	Moesin	67.82	1	1	1	1	1	1
Q14677	CLINT1	Clathrin interactor 1	68.259	6	1	6	5	1	5
Q15637	SF1	Splicing factor 1	68.33	9	5	8	4	5	5
Q01844	EWSR1	RNA-binding protein EWS	68.478	4	2	3	2	2	2
P02768	ALB	Albumin	69.367	100	132	455	35	37	52
Q96PK6	RBM14	RNA-binding protein 14	69.492	3	4	7	3	3	6
O60506	SYNCRIP	Heterogeneous nuclear ribonucleoprotein Q	69.603	5	4	3	4	3	2
P11940	PABPC1	Polyadenylate-binding protein 1	70.671	5	1	4	2	1	3
P11142	HSPA8	Heat shock cognate 71 kDa protein	70.898	21	32	36	13	17	14
Q13409	DYNC1I2	Cytoplasmic dynein 1 intermediate chain 2	71.457	1	1	2	1	1	1
P11021	HSPA5	Endoplasmic reticulum chaperone BiP	72.333	14	16	15	10	10	9
Q92945	KHSRP	Far upstream element-binding protein 2	73.115	2	2	5	2	2	4
O00571	DDX3X	ATP-dependent RNA helicase DDX3X	73.243	3	3	3	3	2	1
P38646	HSPA9	Stress-70 protein, mitochondrial	73.68	7	6	21	6	5	12
P02545	LMNA	Prelamin-A/C	74.139	21	22	17	17	14	12
Q7Z417	NUFIP2	FMR1-interacting protein NUFIP2	76.121	12	9	12	7	6	10
P23246	SFPQ	Splicing factor, proline- and glutamine-rich	76.149	9	4	7	6	3	4
P19338	NCL	Nucleolin	76.614	6	4	5	6	4	4
Q08188	TGM3	Protein-glutamine gamma-glutamyltransferase E	76.632	1	3	3	1	2	3
P02787	TF	Serotransferrin	77.05	11	17	106	10	11	39
P23142	FBLN1	Fibulin-1	77.214	2	1	4	1	1	3
P02788	LTF	Lactotransferrin	78.182	4	2	2	2	1	2
Q14444	CAPRIN1	Caprin-1	78.366	9	13	8	7	8	5
O14641	DVL2	Segment polarity protein dishevelled homolog DVL-2	78.948	2	1	1	2	1	1
Q15027	ACAP1	Arf-GAP with coiled-coil, ANK repeat and PH domain-containing protein 1	81.536	1	2	2	1	1	1
P07900	HSP90AA1	Heat shock protein HSP 90-alpha	84.66	2	4	1	1	4	1
Q9BZL4	PPP1R12C	Protein phosphatase 1 regulatory subunit 12C	84.881	3	3	3	3	2	3
P06396	GSN	Gelsolin	85.698	2	2	25	2	2	16
Q96JE9	MAP6	Microtubule-associated protein 6	86.505	1	1	2	1	1	1
P05556	ITGB1	Integrin beta-1	88.415	4	3	1	3	2	1
Q13263	TRIM28	Transcription intermediary factor 1-beta	88.55	3	2	3	3	1	2
Q15459	SF3A1	Splicing factor 3A subunit 1	88.886	4	4	2	3	2	2
P55072	VCP	Transitional endoplasmic reticulum ATPase	89.322	4	4	1	3	4	1
Q00839	HNRNPU	Heterogeneous nuclear ribonucleoprotein U	90.584	5	1	2	5	1	2
P11387	TOP1	DNA topoisomerase 1	90.726	4	1	2	2	1	2
P14625	HSP90B1	Endoplasmin	92.469	7	3	1	6	2	1
Q05682	CALD1	Caldesmon	93.231	20	11	27	16	8	16
P34932	HSPA4	Heat shock 70 kDa protein 4	94.331	4	1	5	2	1	4
P02671	FGA	Fibrinogen alpha chain	94.973	9	7	4	6	5	3
P01130	LDLR	Low-density lipoprotein receptor	95.376	2	2	1	1	1	1
Q08554	DSC1	Desmocollin-1	99.987	3	6	17	3	4	6
Q13435	SF3B2	Splicing factor 3B subunit 2	100.228	1	1	3	1	1	2
Q9BXP5	SRRT	Serrate RNA effector molecule homolog	100.666	3	4	2	2	2	2
P78344	EIF4G2	Eukaryotic translation initiation factor 4 gamma 2	102.362	4	3	3	4	3	2
Q14624	ITIH4	Inter-alpha-trypsin inhibitor heavy chain H4	103.357	1	1	29	1	1	13
P98175	RBM10	RNA-binding protein 10	103.533	9	4	5	5	4	5
B5ME19	EIF3CL	Eukaryotic translation initiation factor 3 subunit C-like protein	105.473	3	1	3	2	1	2
P19823	ITIH2	Inter-alpha-trypsin inhibitor heavy chain H2	106.463	3	6	43	3	4	21
Q96T37	RBM15	RNA-binding protein 15	107.189	5	1	2	4	1	2
O60763	USO1	General vesicular transport factor p115	107.895	2	2	4	2	2	2
Q9Y2H0	DLGAP4	Disks large-associated protein 4	108.012	1	1	1	1	1	1
O60716	CTNND1	Catenin delta-1	108.17	5	5	8	4	4	5
P33176	KIF5B	Kinesin-1 heavy chain	109.685	7	3	4	6	2	4
Q02241	KIF23	Kinesin-like protein KIF23	110.059	2	1	1	1	1	1
O14983	ATP2A1	Sarcoplasmic/endoplasmic reticulum calcium ATPase 1	110.252	1	2	3	1	2	2
Q8WWM7	ATXN2L	Ataxin-2-like protein	113.374	1	1	3	1	1	2
Q02413	DSG1	Desmoglein-1	113.748	2	11	16	2	8	11
O14974	PPP1R12A	Protein phosphatase 1 regulatory subunit 12A	115.281	19	15	13	10	9	8
Q5T6F2	UBAP2	Ubiquitin-associated protein 2	117.116	2	1	6	2	1	3
Q7L014	DDX46	Probable ATP-dependent RNA helicase DDX46	117.362	2	2	5	2	2	4
Q9P2N5	RBM27	RNA-binding protein 27	118.718	2	2	6	2	2	5
Q05397	PTK2	Focal adhesion kinase 1	119.233	5	1	4	3	1	4
Q86V48	LUZP1	Leucine zipper protein 1	120.275	1	1	4	1	1	4
P27816	MAP4	Microtubule-associated protein 4	121.005	4	4	4	3	3	3
O43896	KIF1C	Kinesin-like protein KIF1C	122.947	2	2	1	1	1	1
O75717	WDHD1	WD repeat and HMG-box DNA-binding protein 1	125.967	1	2	1	1	1	1
P08123	COL1A2	Collagen alpha-2(I) chain	129.314	8	11	9	7	7	7
O94979	SEC31A	Protein transport protein Sec31A	133.015	2	3	1	1	2	1
P02461	COL3A1	Collagen alpha-1(III) chain	138.564	2	1	1	1	1	1
P02452	COL1A1	Collagen alpha-1(I) chain	138.911	20	15	15	10	10	10
O75533	SF3B1	Splicing factor 3B subunit 1	145.83	2	1	4	2	1	3
O60271	SPAG9	C-Jun-amino-terminal kinase-interacting protein 4	146.205	6	3	5	6	3	5
Q9P2E9	RRBP1	Ribosome-binding protein 1	152.456	3	4	4	3	3	4
P01023	A2M	Alpha-2-macroglobulin	163.291	5	8	235	4	7	50
Q9C0C2	TNKS1BP1	182 kDa tankyrase-1-binding protein	181.796	2	1	3	2	1	2
P01024	C3	Complement C3	187.148	7	11	187	7	9	70
P0C0L4	C4A	Complement C4-A	192.785	3	1	1	3	1	1
Q07157	TJP1	Tight junction protein ZO-1	195.459	5	4	5	4	3	3
P52948	NUP98	Nuclear pore complex protein Nup98-Nup96	197.579	2	3	3	2	3	3
E9PAV3	NACA	Nascent polypeptide-associated complex subunit alpha, muscle-specific form	205.422	55	82	75	6	7	6
Q9Y623	MYH4	Myosin-4	223.071	5	6	3	3	6	3
P12882	MYH1	Myosin-1	223.145	18	23	14	13	16	11
P35579	MYH9	Myosin-9	226.532	10	7	6	8	6	4
P35749	MYH11	Myosin-11	227.339	3	1	2	3	1	2
Q9Y490	TLN1	Talin-1	269.767	4	3	4	3	3	3
P46821	MAP1B	Microtubule-associated protein 1B	270.634	6	3	3	3	2	2
P11717	IGF2R	Cation-independent mannose-6-phosphate receptor	274.375	1	1	1	1	1	1
P21333	FLNA	Filamin-A	280.739	18	14	10	14	12	7
Q86YZ3	HRNR	Hornerin	282.39	9	15	69	6	9	18
P46100	ATRX	Transcriptional regulator ATRX	282.587	1	1	1	1	1	1
Q9Y520	PRRC2C	Protein PRRC2C	316.911	2	4	5	2	4	5
Q09666	AHNAK	Neuroblast differentiation-associated protein AHNAK	629.101	21	11	24	14	9	19

## Sheet: Table S3 
Full lists of protein targets of the compete group (10×PIP+PIP-2) group (n=3)
ProteinAccessions	Genes	ProteinDescriptions	Mass（KD）	PSMs			UniquePeptides
				PIP-2/PIP 3_1	PIP-2/PIP 3_2	PIP-2/PIP 3_3	PIP-2/PIP 3_1	PIP-2/PIP 3_2	PIP-2/PIP 3_3
P63313	TMSB10	Thymosin beta-10	5.026	7	6	5	3	3	3
P62328	TMSB4X	Thymosin beta-4	5.053	10	9	14	3	3	3
P02795	MT2A	Metallothionein-2	6.042	4	4	2	2	3	2
P62857	RPS28	Small ribosomal subunit protein eS28	7.841	2	1	1	1	1	1
P42677	RPS27	Small ribosomal subunit protein eS27	9.461	1	1	1	1	1	1
P06703	S100A6	Protein S100-A6	10.18	3	3	3	2	2	2
P59665	DEFA1	Neutrophil defensin 1	10.201	1	1	3	1	1	1
P02656	APOC3	Apolipoprotein C-III	10.852	2	1	1	1	1	1
P61604	HSPE1	10 kDa heat shock protein, mitochondrial	10.932	1	3	7	1	3	4
P01040	CSTA	Cystatin-A	11.006	3	2	2	3	2	2
P02652	APOA2	Apolipoprotein A-II	11.175	5	2	1	4	2	1
P81605	DCD	Dermcidin	11.284	6	6	6	3	3	3
P0DOY2	IGLC2	Immunoglobulin lambda constant 2	11.294	9	4	9	2	1	2
P62805	H4C1	Histone H4	11.367	18	11	9	5	6	5
P20962	PTMS	Parathymosin	11.53	5	1	1	2	1	1
P26447	S100A4	Protein S100-A4	11.729	2	3	2	2	2	2
P10599	TXN	Thioredoxin	11.737	1	4	3	1	3	3
P01834	IGKC	Immunoglobulin kappa constant	11.765	2	1	2	1	1	1
P06454	PTMA	Prothymosin alpha	12.203	6	5	6	3	3	3
P14174	MIF	Macrophage migration inhibitory factor	12.476	1	1	1	1	1	1
P01742	IGHV1-69	Immunoglobulin heavy variable 1-69	12.659	1	1	1	1	1	1
P63027	VAMP2	Vesicle-associated membrane protein 2	12.663	2	1	1	1	1	1
A0A075B6P5	IGKV2-28	Immunoglobulin kappa variable 2-28	12.957	1	1	2	1	1	1
O75348	ATP6V1G1	V-type proton ATPase subunit G 1	13.758	4	1	1	2	1	1
O60814	H2BC12	Histone H2B type 1-K	13.89	4	8	7	3	5	3
P04908	H2AC4	Histone H2A type 1-B/E	14.135	12	4	6	3	2	3
P09382	LGALS1	Galectin-1	14.716	2	2	2	2	2	1
Q15121	PEA15	Astrocytic phosphoprotein PEA-15	15.04	1	1	2	1	1	1
P07737	PFN1	Profilin-1	15.054	1	2	2	1	2	2
P69905	HBA1	Hemoglobin subunit alpha	15.258	18	22	17	5	6	5
Q9NZT1	CALML5	Calmodulin-like protein 5	15.893	4	5	5	2	3	3
P68871	HBB	Hemoglobin subunit beta	15.998	16	23	16	7	7	7
P63241	EIF5A	Eukaryotic translation initiation factor 5A-1	16.832	1	1	1	1	1	1
P0DP23	CALM1	Calmodulin-1	16.838	13	7	4	6	4	3
P60660	MYL6	Myosin light polypeptide 6	16.93	6	5	8	4	5	5
P16949	STMN1	Stathmin	17.303	3	3	2	3	2	2
P62750	RPL23A	Large ribosomal subunit protein uL23	17.695	1	3	3	1	2	2
P30050	RPL12	Large ribosomal subunit protein uL11	17.819	1	1	1	1	1	1
P62937	PPIA	Peptidyl-prolyl cis-trans isomerase A	18.012	4	2	2	3	2	1
P01591	JCHAIN	Immunoglobulin J chain	18.099	1	1	1	1	1	1
P23528	CFL1	Cofilin-1	18.502	15	13	16	7	7	8
P60981	DSTN	Destrin	18.506	2	3	2	1	2	2
P63208	SKP1	S-phase kinase-associated protein 1	18.658	1	1	2	1	1	1
Q96A32	MYL11	Myosin regulatory light chain 11	19.015	2	3	3	2	3	3
P62633	CNBP	CCHC-type zinc finger nucleic acid binding protein	19.463	6	3	2	5	3	2
P49006	MARCKSL1	MARCKS-related protein	19.529	3	2	3	2	2	2
P24844	MYL9	Myosin regulatory light polypeptide 9	19.827	1	2	5	1	2	3
O00193	SMAP	Small acidic protein	20.333	19	10	10	3	3	3
Q03135	CAV1	Caveolin-1	20.472	2	3	2	1	3	2
P21291	CSRP1	Cysteine and glycine-rich protein 1	20.567	2	5	2	2	4	1
Q13442	PDAP1	28 kDa heat- and acid-stable phosphoprotein	20.63	3	4	2	2	2	2
P30086	PEBP1	Phosphatidylethanolamine-binding protein 1	21.057	1	2	2	1	1	1
P05976	MYL1	Myosin light chain 1/3, skeletal muscle isoform	21.145	4	1	3	3	1	3
P16403	H1-2	Histone H1.2	21.365	8	16	10	5	8	6
P84157	MXRA7	Matrix-remodeling-associated protein 7	21.466	13	11	12	2	2	2
Q96DD7	SHISA4	Protein shisa-4	21.522	1	1	1	1	1	1
O43583	DENR	Density-regulated protein	22.092	1	1	3	1	1	1
Q06830	PRDX1	Peroxiredoxin-1	22.11	9	8	10	4	7	8
Q9H3Z4	DNAJC5	DnaJ homolog subfamily C member 5	22.149	12	11	10	4	2	4
O43399	TPD52L2	Tumor protein D54	22.238	4	4	5	3	4	5
Q14919	DRAP1	Dr1-associated corepressor	22.35	1	7	7	1	4	3
P37802	TAGLN2	Transgelin-2	22.391	10	7	25	5	4	7
Q9UI15	TAGLN3	Transgelin-3	22.473	2	1	1	1	1	1
P16401	H1-5	Histone H1.5	22.58	1	8	4	1	4	3
P46781	RPS9	Small ribosomal subunit protein uS4	22.591	1	10	5	1	9	4
Q01995	TAGLN	Transgelin	22.611	10	12	12	7	10	7
O60936	NOL3	Nucleolar protein 3	22.629	1	1	4	1	1	2
Q9BRP8	PYM1	Partner of Y14 and mago	22.656	2	3	1	1	2	1
P04792	HSPB1	Heat shock protein beta-1	22.783	2	1	3	2	1	3
P41236	PPP1R2	Protein phosphatase inhibitor 2	23.015	4	6	4	2	2	1
O76080	ZFAND5	AN1-type zinc finger protein 5	23.132	2	1	1	2	1	1
P43487	RANBP1	Ran-specific GTPase-activating protein	23.31	4	5	8	4	4	4
P0DOX7	NaN	Immunoglobulin kappa light chain	23.379	13	12	7	4	5	4
P50914	RPL14	Large ribosomal subunit protein eL14	23.432	2	1	1	1	1	1
P84098	RPL19	Large ribosomal subunit protein eL19	23.466	2	1	2	1	1	1
P02763	ORM1	Alpha-1-acid glycoprotein 1	23.54	1	2	2	1	2	2
P82979	SARNP	SAP domain-containing ribonucleoprotein	23.671	17	18	21	6	7	6
Q8N128	FAM177A1	Protein FAM177A1	23.757	3	3	2	2	3	2
Q9UQN3	CHMP2B	Charged multivesicular body protein 2b	23.907	1	17	10	1	8	6
P61313	RPL15	Large ribosomal subunit protein eL15	24.146	1	3	2	1	3	2
P62241	RPS8	Small ribosomal subunit protein eS8	24.205	1	7	2	1	4	2
P26373	RPL13	Large ribosomal subunit protein eL13	24.261	7	9	9	4	7	6
P55327	TPD52	Tumor protein D52	24.327	2	3	3	2	2	2
Q9HD15	SRA1	Steroid receptor RNA activator 1	24.4	4	10	7	3	4	5
Q9NZZ3	CHMP5	Charged multivesicular body protein 5	24.571	5	9	15	4	5	6
P24534	EEF1B2	Elongation factor 1-beta	24.764	11	21	17	6	9	7
Q8N488	RYBP	RING1 and YY1-binding protein	24.822	23	17	26	9	6	8
Q9H444	CHMP4B	Charged multivesicular body protein 4b	24.95	11	5	8	6	4	5
Q00688	FKBP3	Peptidyl-prolyl cis-trans isomerase FKBP3	25.177	2	8	5	1	5	4
P09497	CLTB	Clathrin light chain B	25.19	9	14	11	7	8	6
Q01130	SRSF2	Serine/arginine-rich splicing factor 2	25.476	26	17	18	6	6	6
Q7RTV2	GSTA5	Glutathione S-transferase A5	25.722	1	2	1	1	1	1
P0CG47	UBB	Polyubiquitin-B	25.762	12	13	16	4	5	5
Q96CT7	CCDC124	Coiled-coil domain-containing protein 124	25.835	11	15	11	3	4	3
P08294	SOD3	Extracellular superoxide dismutase [Cu-Zn]	25.851	1	2	1	1	1	1
O75391	SPAG7	Sperm-associated antigen 7	26.034	2	13	5	2	7	4
Q9NX63	CHCHD3	MICOS complex subunit MIC19	26.152	2	5	4	2	3	2
P54105	CLNS1A	Methylosome subunit pICln	26.215	6	3	6	2	2	2
Q9Y3Y2	CHTOP	Chromatin target of PRMT1 protein	26.397	3	5	3	1	2	2
P07477	PRSS1	Serine protease 1	26.558	6	2	4	2	2	2
Q9P013	CWC15	Spliceosome-associated protein CWC15 homolog	26.624	14	16	13	8	8	8
P60174	TPI1	Triosephosphate isomerase	26.669	4	3	5	4	3	4
P23396	RPS3	Small ribosomal subunit protein uS3	26.688	5	40	21	4	15	10
Q96C19	EFHD2	EF-hand domain-containing protein D2	26.697	32	28	38	10	10	11
O75940	SMNDC1	Survival of motor neuron-related-splicing factor 30	26.711	4	11	10	4	7	7
P51858	HDGF	Hepatoma-derived growth factor	26.788	6	3	8	4	3	3
Q86V81	ALYREF	THO complex subunit 4	26.888	69	70	50	8	8	8
O00299	CLIC1	Chloride intracellular channel protein 1	26.923	2	13	7	2	7	5
P09496	CLTA	Clathrin light chain A	27.077	12	31	17	5	8	6
Q9UKY7	CDV3	Protein CDV3 homolog	27.335	12	9	8	5	4	5
Q16629	SRSF7	Serine/arginine-rich splicing factor 7	27.367	4	6	4	4	4	3
Q15056	EIF4H	Eukaryotic translation initiation factor 4H	27.385	26	49	37	12	15	14
Q9UL46	PSME2	Proteasome activator complex subunit 2	27.402	2	4	2	1	4	1
Q9H2J4	PDCL3	Phosducin-like protein 3	27.614	8	8	10	3	4	4
Q9NX40	OCIAD1	OCIA domain-containing protein 1	27.626	13	5	3	5	3	3
P04156	PRNP	Major prion protein	27.661	1	1	2	1	1	1
P63104	YWHAZ	14-3-3 protein zeta/delta	27.745	6	11	11	4	7	8
Q07955	SRSF1	Serine/arginine-rich splicing factor 1	27.745	34	24	30	11	9	12
P27348	YWHAQ	14-3-3 protein theta	27.764	10	20	15	6	10	8
P62917	RPL8	Large ribosomal subunit protein uL2	28.025	5	9	9	4	6	6
P31946	YWHAB	14-3-3 protein beta/alpha	28.082	2	6	3	1	3	2
O00287	RFXAP	Regulatory factor X-associated protein	28.232	3	1	3	2	1	2
P61981	YWHAG	14-3-3 protein gamma	28.303	2	12	2	1	7	2
P67936	TPM4	Tropomyosin alpha-4 chain	28.522	27	100	105	10	21	20
P62753	RPS6	Small ribosomal subunit protein eS6	28.681	8	8	12	4	5	6
Q06323	PSME1	Proteasome activator complex subunit 1	28.723	4	18	13	3	8	8
P12004	PCNA	Proliferating cell nuclear antigen	28.769	19	20	23	8	10	10
Q92688	ANP32B	Acidic leucine-rich nuclear phosphoprotein 32 family member B	28.788	6	5	5	2	2	2
O95721	SNAP29	Synaptosomal-associated protein 29	28.97	17	5	10	4	4	5
Q16594	TAF9	Transcription initiation factor TFIID subunit 9	28.974	4	6	3	3	4	2
P30040	ERP29	Endoplasmic reticulum resident protein 29	28.993	3	3	2	2	2	2
P50402	EMD	Emerin	28.994	5	4	5	2	2	3
O14618	CCS	Copper chaperone for superoxide dismutase	29.041	2	3	1	1	1	1
O75822	EIF3J	Eukaryotic translation initiation factor 3 subunit J	29.062	17	15	19	9	8	8
Q96G25	MED8	Mediator of RNA polymerase II transcription subunit 8	29.08	2	6	2	2	4	2
P62258	YWHAE	14-3-3 protein epsilon	29.174	16	47	27	9	16	13
O43752	STX6	Syntaxin-6	29.176	3	5	6	2	3	4
P18846	ATF1	Cyclic AMP-dependent transcription factor ATF-1	29.233	5	2	6	4	2	4
P25786	PSMA1	Proteasome subunit alpha type-1	29.556	2	12	10	2	7	6
P07451	CA3	Carbonic anhydrase 3	29.557	1	2	1	1	1	1
Q14847	LASP1	LIM and SH3 domain protein 1	29.717	22	27	41	12	12	12
O75937	DNAJC8	DnaJ homolog subfamily C member 8	29.842	18	12	20	9	6	8
Q8WXX5	DNAJC9	DnaJ homolog subfamily C member 9	29.91	2	3	3	2	3	3
P61247	RPS3A	Small ribosomal subunit protein eS1	29.945	13	18	17	7	10	9
P62424	RPL7A	Large ribosomal subunit protein eL8	29.996	1	13	11	1	8	6
Q15691	MAPRE1	Microtubule-associated protein RP/EB family member 1	29.999	2	6	5	2	6	4
P47756	CAPZB	F-actin-capping protein subunit beta	30.629	1	10	4	1	6	3
Q9BTT0	ANP32E	Acidic leucine-rich nuclear phosphoprotein 32 family member E	30.692	6	8	11	3	3	3
Q9BT09	CNPY3	Protein canopy homolog 3	30.748	12	6	7	4	4	5
P21796	VDAC1	Voltage-dependent anion-selective channel protein 1	30.773	15	11	20	7	7	9
P02647	APOA1	Apolipoprotein A-I	30.778	22	16	18	14	10	10
O94760	DDAH1	N(G),N(G)-dimethylarginine dimethylaminohydrolase 1	31.122	16	4	8	8	3	6
P29692	EEF1D	Elongation factor 1-delta	31.122	9	11	13	4	4	5
Q13643	FHL3	Four and a half LIM domains protein 3	31.192	3	5	3	3	4	3
Q13243	SRSF5	Serine/arginine-rich splicing factor 5	31.264	2	5	2	2	3	2
P09012	SNRPA	U1 small nuclear ribonucleoprotein A	31.28	7	9	4	5	4	3
P15880	RPS2	Small ribosomal subunit protein uS5	31.324	4	11	10	3	8	6
P45880	VDAC2	Voltage-dependent anion-selective channel protein 2	31.567	5	4	3	4	4	3
O00625	PIR	Pirin	32.113	1	1	2	1	1	2
Q14192	FHL2	Four and a half LIM domains protein 2	32.193	4	5	6	4	4	4
Q14165	MLEC	Malectin	32.234	3	4	1	2	3	1
P43307	SSR1	Translocon-associated protein subunit alpha	32.235	8	4	7	3	2	3
P35030	PRSS3	Trypsin-3	32.529	2	3	3	1	1	2
P06748	NPM1	Nucleophosmin	32.575	5	3	3	4	2	3
P09493	TPM1	Tropomyosin alpha-1 chain	32.709	27	24	30	13	14	14
Q86U42	PABPN1	Polyadenylate-binding protein 2	32.749	1	1	2	1	1	1
Q7Z6A9	BTLA	B- and T-lymphocyte attenuator	32.834	1	1	2	1	1	1
P07951	TPM2	Tropomyosin beta chain	32.851	7	8	4	5	5	4
A0A8I5KQE6	RPSA2	Small ribosomal subunit protein uS2B	32.909	2	4	4	2	3	3
P06753	TPM3	Tropomyosin alpha-3 chain	32.95	138	70	86	22	9	8
P51911	CNN1	Calponin-1	33.17	1	2	3	1	2	3
Q9Y314	NOSIP	Nitric oxide synthase-interacting protein	33.172	3	4	2	2	2	2
P54920	NAPA	Alpha-soluble NSF attachment protein	33.233	2	5	3	2	4	3
Q99623	PHB2	Prohibitin-2	33.296	3	6	5	2	5	5
Q04323	UBXN1	UBX domain-containing protein 1	33.325	4	1	4	4	1	3
Q9UNP9	PPIE	Peptidyl-prolyl cis-trans isomerase E	33.431	6	2	2	3	1	2
Q9UEE9	CFDP1	Craniofacial development protein 1	33.593	2	1	2	1	1	2
P07910	HNRNPC	Heterogeneous nuclear ribonucleoproteins C1/C2	33.67	1	1	2	1	1	1
Q99439	CNN2	Calponin-2	33.697	13	7	8	6	5	5
Q8NBJ7	SUMF2	Inactive C-alpha-formylglycine-generating enzyme 2	33.843	3	5	5	3	4	4
P23193	TCEA1	Transcription elongation factor A protein 1	33.97	2	3	8	1	2	5
O43765	SGTA	Small glutamine-rich tetratricopeptide repeat-containing protein alpha	34.063	7	4	10	4	2	4
P05388	RPLP0	Large ribosomal subunit protein uL10	34.274	4	3	4	3	3	4
O15144	ARPC2	Actin-related protein 2/3 complex subunit 2	34.333	1	10	7	1	8	5
P46777	RPL5	Large ribosomal subunit protein uL18	34.363	1	4	11	1	4	4
P05089	ARG1	Arginase-1	34.735	6	1	2	4	1	2
Q8NFH5	NUP35	Nucleoporin NUP35	34.774	1	1	1	1	1	1
Q9HC38	GLOD4	Glyoxalase domain-containing protein 4	34.793	1	2	1	1	2	1
Q15006	EMC2	ER membrane protein complex subunit 2	34.834	2	3	3	1	3	3
Q96AG4	LRRC59	Leucine-rich repeat-containing protein 59	34.93	2	2	4	1	1	3
P63244	RACK1	Small ribosomal subunit protein RACK1	35.077	8	22	10	5	11	9
P13804	ETFA	Electron transfer flavoprotein subunit alpha, mitochondrial	35.08	1	9	5	1	6	4
P15408	FOSL2	Fos-related antigen 2	35.193	2	1	1	2	1	1
Q9Y448	KNSTRN	Small kinetochore-associated protein	35.438	1	1	1	1	1	1
P40926	MDH2	Malate dehydrogenase, mitochondrial	35.503	16	15	18	9	8	11
Q96HY6	DDRGK1	DDRGK domain-containing protein 1	35.611	2	1	1	2	1	1
O75821	EIF3G	Eukaryotic translation initiation factor 3 subunit G	35.611	3	2	3	1	2	3
P09525	ANXA4	Annexin A4	35.883	6	5	6	5	2	4
P67809	YBX1	Y-box-binding protein 1	35.924	2	3	7	1	1	4
P08758	ANXA5	Annexin A5	35.937	8	12	9	4	6	8
P04406	GAPDH	Glyceraldehyde-3-phosphate dehydrogenase	36.053	7	7	8	5	5	7
O00151	PDLIM1	PDZ and LIM domain protein 1	36.072	13	5	14	4	3	4
Q15717	ELAVL1	ELAV-like protein 1	36.092	1	3	2	1	3	2
Q99729	HNRNPAB	Heterogeneous nuclear ribonucleoprotein A/B	36.225	5	8	12	3	4	5
P53597	SUCLG1	Succinate--CoA ligase [ADP/GDP-forming] subunit alpha, mitochondrial	36.25	1	1	1	1	1	1
P12429	ANXA3	Annexin A3	36.375	1	1	2	1	1	1
P07195	LDHB	L-lactate dehydrogenase B chain	36.638	1	1	1	1	1	1
P00338	LDHA	L-lactate dehydrogenase A chain	36.689	8	5	7	5	5	5
O43852	CALU	Calumenin	37.107	13	16	15	4	5	5
O95218	ZRANB2	Zinc finger Ran-binding domain-containing protein 2	37.404	1	1	3	1	1	1
P22626	HNRNPA2B1	Heterogeneous nuclear ribonucleoproteins A2/B1	37.43	81	86	97	13	15	15
Q96D15	RCN3	Reticulocalbin-3	37.493	5	2	4	2	2	3
P02749	APOH	Beta-2-glycoprotein 1	38.298	2	2	1	2	2	1
P20042	EIF2S2	Eukaryotic translation initiation factor 2 subunit 2	38.388	2	1	2	1	1	2
P51884	LUM	Lumican	38.429	1	2	2	1	2	1
Q14103	HNRNPD	Heterogeneous nuclear ribonucleoprotein D0	38.434	6	8	12	5	4	7
P07355	ANXA2	Annexin A2	38.604	10	6	20	8	5	10
P04083	ANXA1	Annexin A1	38.714	4	6	3	4	4	3
P09651	HNRNPA1	Heterogeneous nuclear ribonucleoprotein A1	38.747	27	32	44	11	11	11
O14745	NHERF1	Na(+)/H(+) exchange regulatory cofactor NHE-RF1	38.868	1	4	3	1	2	2
P02765	AHSG	Alpha-2-HS-glycoprotein	39.341	5	6	4	3	3	3
P04075	ALDOA	Fructose-bisphosphate aldolase A	39.42	5	9	9	4	5	6
P51991	HNRNPA3	Heterogeneous nuclear ribonucleoprotein A3	39.595	26	19	40	9	8	8
Q9NSC5	HOMER3	Homer protein homolog 3	39.836	1	1	1	1	1	1
P16989	YBX3	Y-box-binding protein 3	40.09	8	5	3	3	3	1
Q00325	SLC25A3	Solute carrier family 25 member 3	40.095	2	9	3	2	5	2
Q9UNZ2	NSFL1C	NSFL1 cofactor p47	40.573	10	8	9	7	6	8
P55036	PSMD4	26S proteasome non-ATPase regulatory subunit 4	40.737	2	1	5	2	1	3
P62736	ACTA2	Actin, aortic smooth muscle	42.009	41	7	12	12	3	3
P38159	RBMX	RNA-binding motif protein, X chromosome	42.332	5	4	6	3	4	5
P01876	IGHA1	Immunoglobulin heavy constant alpha 1	42.849	5	6	5	3	5	4
P06732	CKM	Creatine kinase M-type	43.101	6	3	3	5	2	3
P54727	RAD23B	UV excision repair protein RAD23 homolog B	43.171	4	3	4	3	2	4
Q6NZI2	CAVIN1	Caveolae-associated protein 1	43.476	21	22	26	7	9	8
P01859	IGHG2	Immunoglobulin heavy constant gamma 2	43.806	5	7	7	2	5	6
P01857	IGHG1	Immunoglobulin heavy constant gamma 1	43.912	9	5	5	5	3	4
Q13561	DCTN2	Dynactin subunit 2	44.231	1	2	3	1	2	2
P07339	CTSD	Cathepsin D	44.552	3	2	4	2	2	3
Q8NC51	SERBP1	SERPINE1 mRNA-binding protein 1	44.965	18	19	17	13	11	9
Q93088	BHMT	Betaine--homocysteine S-methyltransferase 1	44.998	1	2	3	1	2	2
P00738	HP	Haptoglobin	45.205	14	10	8	11	9	7
Q9BY77	POLDIP3	Polymerase delta-interacting protein 3	46.089	2	5	4	2	4	3
O14979	HNRNPDL	Heterogeneous nuclear ribonucleoprotein D-like	46.438	2	4	3	1	2	3
Q9Y383	LUC7L2	Putative RNA-binding protein Luc7-like 2	46.514	1	5	2	1	5	2
P01009	SERPINA1	Alpha-1-antitrypsin	46.737	11	12	8	8	9	7
P13929	ENO3	Beta-enolase	46.987	3	1	2	1	1	1
P06733	ENO1	Alpha-enolase	47.169	9	3	2	6	2	2
Q15084	PDIA6	Protein disulfide-isomerase A6	48.121	4	3	4	2	2	3
Q9UJU6	DBNL	Drebrin-like protein	48.207	15	9	10	8	6	6
P68371	TUBB4B	Tubulin beta-4B chain	49.831	6	1	3	5	1	2
P26641	EEF1G	Elongation factor 1-gamma	50.119	3	5	2	2	4	2
P68104	EEF1A1	Elongation factor 1-alpha 1	50.141	7	9	8	4	6	6
P42167	TMPO	Lamina-associated polypeptide 2, isoforms beta/gamma	50.67	8	3	5	4	2	4
Q16181	SEPTIN7	Septin-7	50.68	1	2	2	1	2	2
O43670	ZNF207	BUB3-interacting and GLEBS motif-containing protein ZNF207	50.751	1	4	2	1	3	2
P61978	HNRNPK	Heterogeneous nuclear ribonucleoprotein K	50.976	17	18	15	9	10	8
P08779	KRT16	Keratin, type I cytoskeletal 16	51.268	11	2	3	6	2	3
P02679	FGG	Fibrinogen gamma chain	51.512	2	4	1	2	3	1
P02533	KRT14	Keratin, type I cytoskeletal 14	51.561	60	26	41	22	16	16
P02790	HPX	Hemopexin	51.676	1	1	2	1	1	1
P01871	IGHM	Immunoglobulin heavy constant mu	51.924	2	3	1	2	3	1
Q13283	G3BP1	Ras GTPase-activating protein-binding protein 1	52.164	2	2	3	1	1	1
P01008	SERPINC1	Antithrombin-III	52.602	2	5	3	2	4	3
P02774	GC	Vitamin D-binding protein	52.918	3	2	1	3	1	1
P35637	FUS	RNA-binding protein FUS	53.426	18	15	15	5	5	5
P17661	DES	Desmin	53.536	18	17	10	10	13	9
P08670	VIM	Vimentin	53.652	17	9	27	11	7	17
Q02818	NUCB1	Nucleobindin-1	53.879	1	3	4	1	3	4
P04004	VTN	Vitronectin	54.306	5	4	4	3	3	3
P02675	FGB	Fibrinogen beta chain	55.928	2	1	2	2	1	1
P06576	ATP5F1B	ATP synthase subunit beta, mitochondrial	56.56	8	7	4	5	5	4
Q8N6H7	ARFGAP2	ADP-ribosylation factor GTPase-activating protein 2	56.72	5	5	10	5	4	7
P30101	PDIA3	Protein disulfide-isomerase A3	56.782	12	12	14	7	8	8
P07237	P4HB	Protein disulfide-isomerase	57.116	7	6	11	7	6	8
Q7RTS7	KRT74	Keratin, type II cytoskeletal 74	57.865	6	4	4	1	1	1
P14618	PKM	Pyruvate kinase PKM	57.937	8	3	4	5	3	4
P13645	KRT10	Keratin, type I cytoskeletal 10	58.827	106	34	82	22	17	23
P25705	ATP5F1A	ATP synthase subunit alpha, mitochondrial	59.751	7	6	4	5	5	3
P04040	CAT	Catalase	59.756	3	1	2	2	1	2
P02538	KRT6A	Keratin, type II cytoskeletal 6A	60.045	1	54	1	1	14	1
O75475	PSIP1	PC4 and SFRS1-interacting protein	60.103	3	6	6	3	4	5
P10809	HSPD1	60 kDa heat shock protein, mitochondrial	61.055	3	8	6	3	7	6
Q9NXV6	CDKN2AIP	CDKN2A-interacting protein	61.125	4	1	3	2	1	2
Q13573	SNW1	SNW domain-containing protein 1	61.494	4	2	3	3	2	3
Q14247	CTTN	Src substrate cortactin	61.586	21	17	22	12	14	13
O95817	BAG3	BAG family molecular chaperone regulator 3	61.595	2	2	1	2	1	1
P35527	KRT9	Keratin, type I cytoskeletal 9	62.064	79	33	50	23	14	16
O75914	PAK3	Serine/threonine-protein kinase PAK 3	62.31	2	1	1	1	1	1
P13647	KRT5	Keratin, type II cytoskeletal 5	62.378	40	16	26	21	13	16
P23141	CES1	Liver carboxylesterase 1	62.521	1	1	2	1	1	1
P31948	STIP1	Stress-induced-phosphoprotein 1	62.639	14	16	18	12	14	12
Q9NRR5	UBQLN4	Ubiquilin-4	63.853	1	3	3	1	1	2
Q96HC4	PDLIM5	PDZ and LIM domain protein 5	63.945	4	3	4	2	2	3
Q5T749	KPRP	Keratinocyte proline-rich protein	64.136	1	1	5	1	1	4
Q8WXI9	GATAD2B	Transcriptional repressor p66-beta	65.261	2	4	1	2	3	1
Q9UHD8	SEPTIN9	Septin-9	65.401	1	1	1	1	1	1
P35908	KRT2	Keratin, type II cytoskeletal 2 epidermal	65.433	122	39	83	34	21	29
Q07065	CKAP4	Cytoskeleton-associated protein 4	66.022	1	4	3	1	3	3
P04264	KRT1	Keratin, type II cytoskeletal 1	66.039	171	81	89	35	26	26
Q96JB3	HIC2	Hypermethylated in cancer 2 protein	66.156	1	1	3	1	1	1
P20700	LMNB1	Lamin-B1	66.408	1	3	3	1	3	2
Q8N8S7	ENAH	Protein enabled homolog	66.51	1	3	1	1	1	1
Q6UN15	FIP1L1	Pre-mRNA 3'-end-processing factor FIP1	66.526	9	6	7	3	3	3
Q96HN2	AHCYL2	Adenosylhomocysteinase 3	66.721	2	1	1	2	1	1
Q96AE4	FUBP1	Far upstream element-binding protein 1	67.56	5	10	3	3	5	3
P27824	CANX	Calnexin	67.568	5	1	3	4	1	3
Q14677	CLINT1	Clathrin interactor 1	68.259	1	2	3	1	1	2
Q15637	SF1	Splicing factor 1	68.33	3	2	3	3	2	3
Q01844	EWSR1	RNA-binding protein EWS	68.478	3	3	4	2	2	2
P02771	AFP	Alpha-fetoprotein	68.678	2	1	1	1	1	1
P02768	ALB	Albumin	69.367	148	128	133	38	32	33
O60506	SYNCRIP	Heterogeneous nuclear ribonucleoprotein Q	69.603	1	2	2	1	2	2
Q8NAB2	KBTBD3	Kelch repeat and BTB domain-containing protein 3	69.839	1	1	1	1	1	1
P11142	HSPA8	Heat shock cognate 71 kDa protein	70.898	23	20	14	12	11	7
P01042	KNG1	Kininogen-1	71.957	3	1	2	2	1	2
P11021	HSPA5	Endoplasmic reticulum chaperone BiP	72.333	12	10	16	9	8	10
P13667	PDIA4	Protein disulfide-isomerase A4	72.932	1	1	1	1	1	1
Q92945	KHSRP	Far upstream element-binding protein 2	73.115	2	2	3	2	2	2
O00571	DDX3X	ATP-dependent RNA helicase DDX3X	73.243	2	1	3	2	1	2
P38646	HSPA9	Stress-70 protein, mitochondrial	73.68	3	5	6	3	4	6
P02545	LMNA	Prelamin-A/C	74.139	10	15	16	7	12	12
Q7Z417	NUFIP2	FMR1-interacting protein NUFIP2	76.121	2	6	6	2	5	5
P23246	SFPQ	Splicing factor, proline- and glutamine-rich	76.149	4	4	2	2	2	1
P19338	NCL	Nucleolin	76.614	7	6	8	5	5	4
Q08188	TGM3	Protein-glutamine gamma-glutamyltransferase E	76.632	1	2	4	1	2	2
P02787	TF	Serotransferrin	77.05	25	15	15	15	9	11
P02788	LTF	Lactotransferrin	78.182	4	3	2	3	2	2
Q14444	CAPRIN1	Caprin-1	78.366	11	7	10	8	6	7
Q92615	LARP4B	La-related protein 4B	80.552	1	1	1	1	1	1
P08238	HSP90AB1	Heat shock protein HSP 90-beta	83.264	5	1	2	3	1	2
Q9BZL4	PPP1R12C	Protein phosphatase 1 regulatory subunit 12C	84.881	1	4	4	1	3	3
P05556	ITGB1	Integrin beta-1	88.415	1	3	4	1	3	2
Q15459	SF3A1	Splicing factor 3A subunit 1	88.886	1	2	1	1	1	1
P55072	VCP	Transitional endoplasmic reticulum ATPase	89.322	2	2	3	1	1	2
P11387	TOP1	DNA topoisomerase 1	90.726	2	2	3	1	1	1
P14625	HSP90B1	Endoplasmin	92.469	2	6	2	2	5	2
Q05682	CALD1	Caldesmon	93.231	19	12	10	10	9	8
P02671	FGA	Fibrinogen alpha chain	94.973	10	9	9	6	5	7
Q08554	DSC1	Desmocollin-1	99.987	2	2	4	2	2	3
Q13435	SF3B2	Splicing factor 3B subunit 2	100.228	1	2	4	1	2	3
Q9BXP5	SRRT	Serrate RNA effector molecule homolog	100.666	1	2	3	1	1	2
P98175	RBM10	RNA-binding protein 10	103.533	1	2	2	1	1	2
P19823	ITIH2	Inter-alpha-trypsin inhibitor heavy chain H2	106.463	3	5	3	3	3	2
O60763	USO1	General vesicular transport factor p115	107.895	2	3	1	2	2	1
O60716	CTNND1	Catenin delta-1	108.17	9	2	6	6	2	4
P33176	KIF5B	Kinesin-1 heavy chain	109.685	2	6	3	2	5	3
O14983	ATP2A1	Sarcoplasmic/endoplasmic reticulum calcium ATPase 1	110.252	1	2	1	1	1	1
Q02413	DSG1	Desmoglein-1	113.748	8	1	9	8	1	4
O14974	PPP1R12A	Protein phosphatase 1 regulatory subunit 12A	115.281	12	13	8	6	6	6
P26006	ITGA3	Integrin alpha-3	116.612	1	1	2	1	1	1
Q86V48	LUZP1	Leucine zipper protein 1	120.275	1	2	1	1	1	1
P08123	COL1A2	Collagen alpha-2(I) chain	129.314	17	8	10	8	7	6
P02461	COL3A1	Collagen alpha-1(III) chain	138.564	1	2	2	1	2	1
P02452	COL1A1	Collagen alpha-1(I) chain	138.911	17	10	15	10	7	10
Q9P2E9	RRBP1	Ribosome-binding protein 1	152.456	1	3	2	1	3	1
P01023	A2M	Alpha-2-macroglobulin	163.291	20	7	11	15	6	5
Q9C0C2	TNKS1BP1	182 kDa tankyrase-1-binding protein	181.796	1	2	1	1	2	1
P01024	C3	Complement C3	187.148	6	12	8	6	8	7
P0C0L4	C4A	Complement C4-A	192.785	3	2	2	3	2	1
Q9H792	PEAK1	Inactive tyrosine-protein kinase PEAK1	193.106	3	2	1	1	1	1
Q07157	TJP1	Tight junction protein ZO-1	195.459	3	4	3	3	4	3
P52948	NUP98	Nuclear pore complex protein Nup98-Nup96	197.579	3	2	2	3	2	2
E9PAV3	NACA	Nascent polypeptide-associated complex subunit alpha, muscle-specific form	205.422	77	44	58	6	6	6
Q15746	MYLK	Myosin light chain kinase, smooth muscle	210.715	1	1	1	1	1	1
Q9Y623	MYH4	Myosin-4	223.071	22	22	5	17	17	4
P12882	MYH1	Myosin-1	223.145	2	3	17	1	2	16
P35579	MYH9	Myosin-9	226.532	5	7	6	4	5	4
P35749	MYH11	Myosin-11	227.339	5	7	1	4	5	1
P48634	PRRC2A	Protein PRRC2A	228.863	2	1	2	2	1	2
P46821	MAP1B	Microtubule-associated protein 1B	270.634	3	3	3	2	2	2
P11717	IGF2R	Cation-independent mannose-6-phosphate receptor	274.375	2	1	1	1	1	1
P21333	FLNA	Filamin-A	280.739	16	16	17	13	13	13
Q86YZ3	HRNR	Hornerin	282.39	9	6	3	6	4	3
P15924	DSP	Desmoplakin	331.774	27	1	8	23	1	8
Q09666	AHNAK	Neuroblast differentiation-associated protein AHNAK	629.101	19	16	12	12	10	9
Q8WZ42	TTN	Titin	3816.03	2	1	1	1	1	1
